# Supplementary material for: N-Heterocyclic carbene and cyclic (alkyl)(amino)carbene complexes of vanadium(iii) and vanadium(v)
Source: Royal Society of Chemistry journal article supplement (doi:10.1039/d2dt01250b), 2022-01-01
Supplement: d2dt01250b1.pdf [file d2dt01250b1.pdf]

**Electronic Supplementary Information for:**

***N*-Heterocyclic Carbene and Cyclic (Alkyl)(amino)carbene Complexes of Vanadium(III) and Vanadium(V)**

Günther Horrer<sup>[a]</sup>, Ivo Krummenacher<sup>[a,b]</sup>, Sophie Mann<sup>[a]</sup>, Holger Braunschweig<sup>[a,b]</sup> and Udo Radius<sup>[a]\*</sup>.

<sup>[a]</sup>Institut für Anorganische Chemie, Julius-Maximilians-Universität Würzburg, Am Hubland, 97074 Würzburg, Germany.

<sup>[b]</sup>Institute for Sustainable Chemistry & Catalysis with Boron, Julius-Maximilians-Universität Würzburg, Am Hubland, 97074 Würzburg, Germany.

**Table of Contents:**

- 1) **NMR spectra of compounds**
- 2) **Crystal structures of the compounds**
- 3) **UV-VIS Spectra of  $[\text{VCl}_3(\text{cAAC}^{\text{Me}})]$  1 ,  $[\text{VCl}_3(\text{IMes})]$  2, their oxidized forms and  $[\text{VCl}_3(\text{cAAC}^{\text{Me}})_2]$  7**
- 4) **EPR Experimental Data**
- 5) **Computational details – optimized geometries**
- 6) **References**

## 1) NMR spectra of the compounds

### NMR spectra of [(IDipp)VOCl<sub>3</sub>] **12**

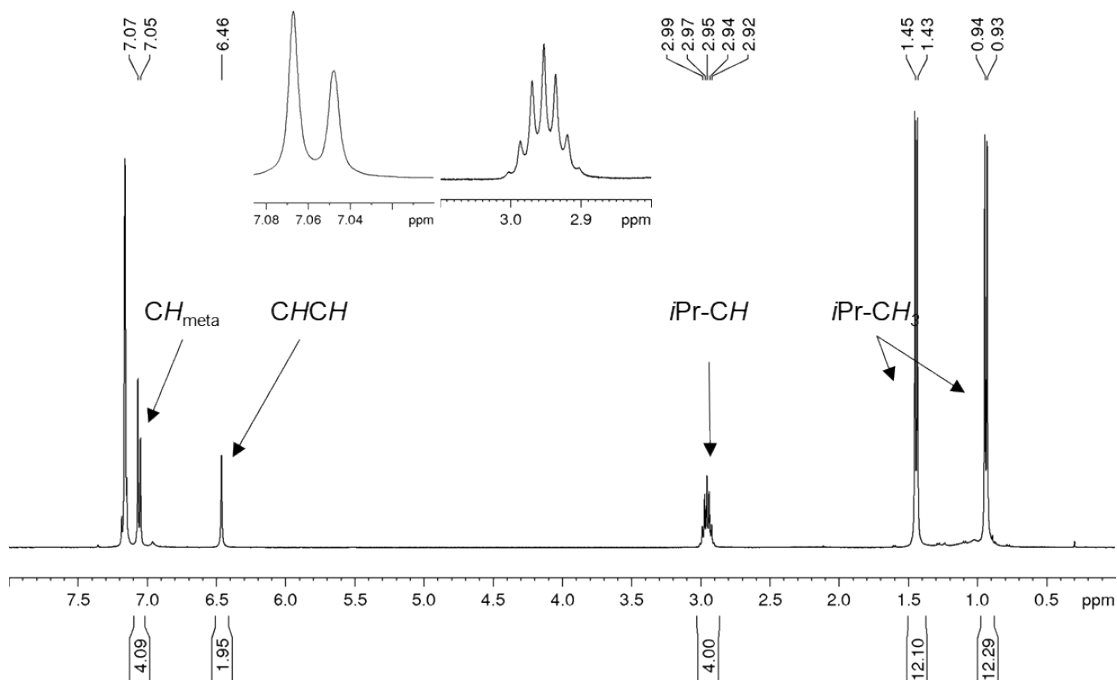

**Figure**

**Figure S1:** <sup>1</sup>H-NMR-spectrum of [(IDipp)VOCl<sub>3</sub>] **12** in C<sub>6</sub>D<sub>6</sub>. The signal for the *para*-positioned protons is hidden by the residual proton resonance of C<sub>6</sub>D<sub>5</sub>H (the signals were assigned *via* HSQC and HMBC correlation experiments).

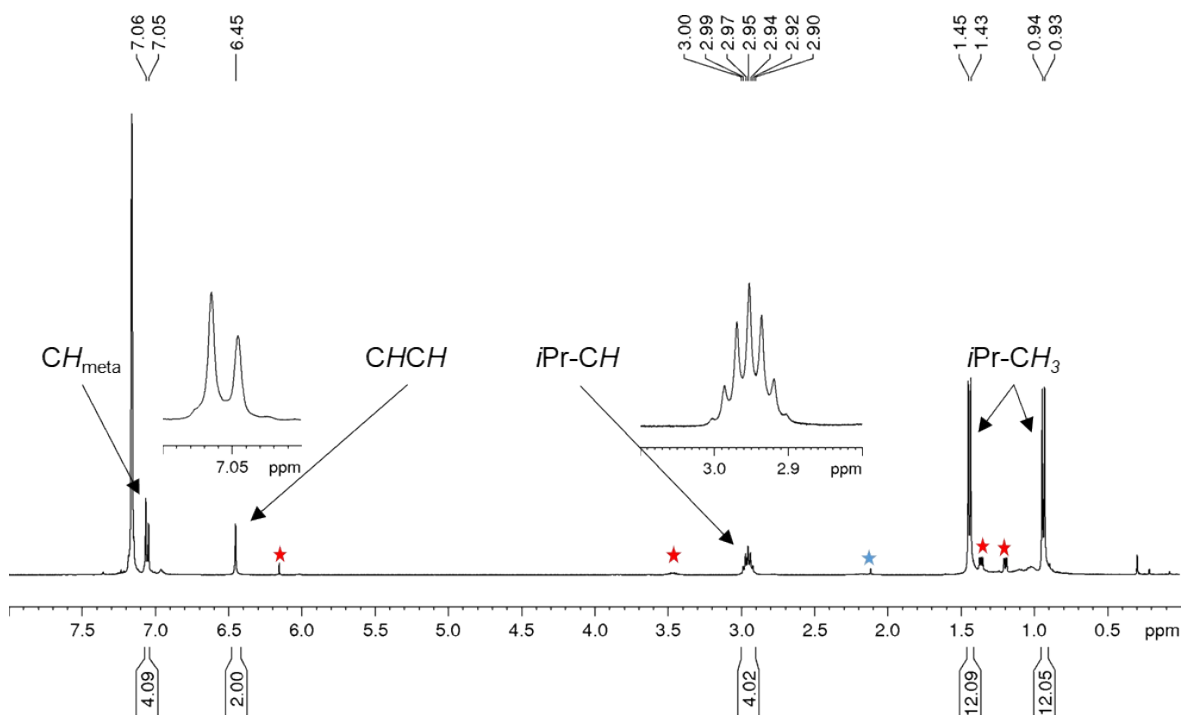

**Figure S2:** <sup>1</sup>H-NMR-spectrum of [(IDipp)VOCl<sub>3</sub>] **12** in C<sub>6</sub>D<sub>6</sub>. The signal for the *para*-positioned protons is hidden by the residual proton resonance of C<sub>6</sub>D<sub>5</sub>H (the signals were assigned *via* HSQC and HMBC correlation experiments). Red asterisk: residual decomposition signals of a IPr species. Blue asterisk: residual toluene signal.

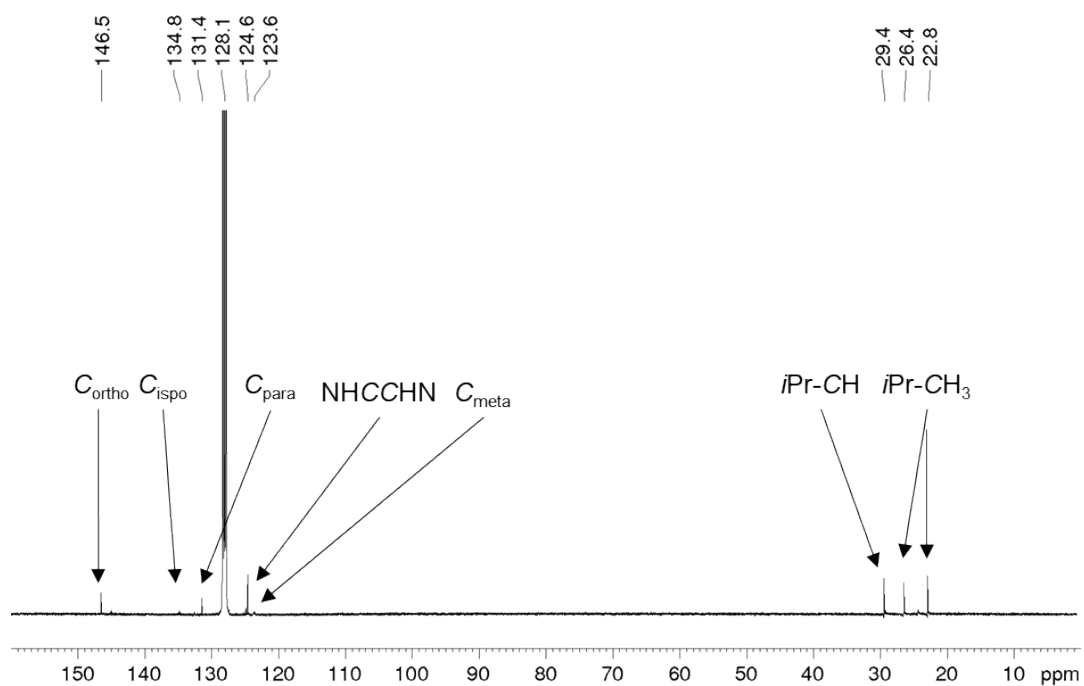

**Figure S3:**  $^{13}\text{C}$ -NMR spectrum of  $[(\text{IDipp})\text{VOCl}_3]$  **12** in  $\text{C}_6\text{D}_6$ . The carbene carbon atom was not detected due to the quadrupole moment of  $^{51}\text{V}$ .

**NMR spectra of  $[(\text{SIDipp})\text{VOCl}_3]$  **13****

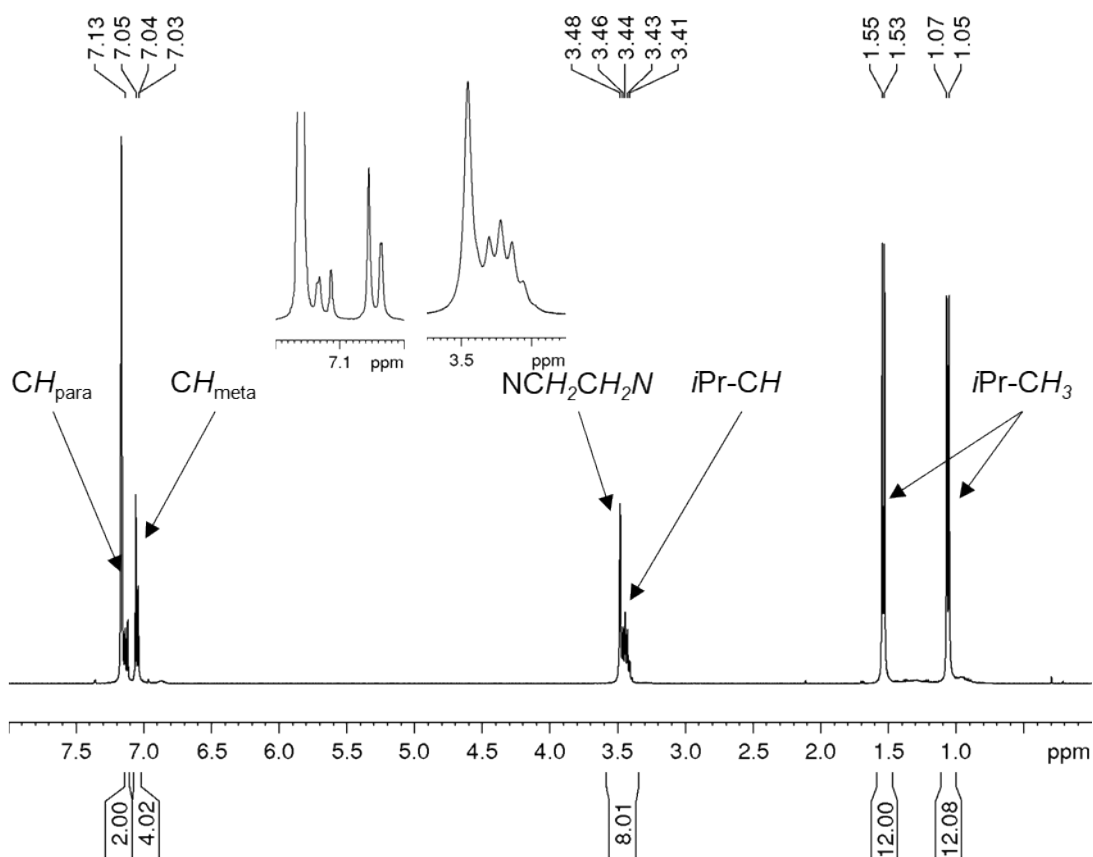

**Figure S4:**  $^1\text{H}$ -NMR spectrum of  $[(\text{SIDipp})\text{VOCl}_3]$  **13** in  $\text{C}_6\text{D}_6$ .

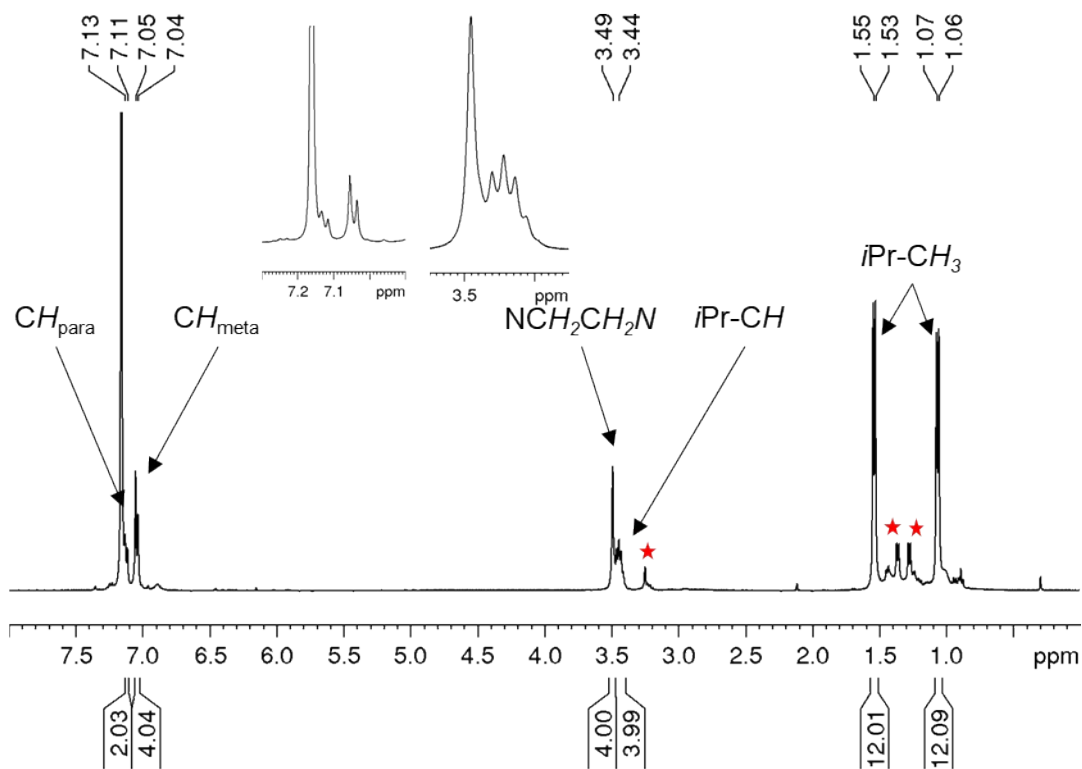

**Figure S5:**  $^1\text{H-NMR}$ -spectrum of the reaction of  $[(\text{SIDipp})\text{VCl}_3]$  **5** in  $\text{C}_6\text{D}_6$  with oxygen. Red asterisk: residual decomposition signals of a SIPr species.

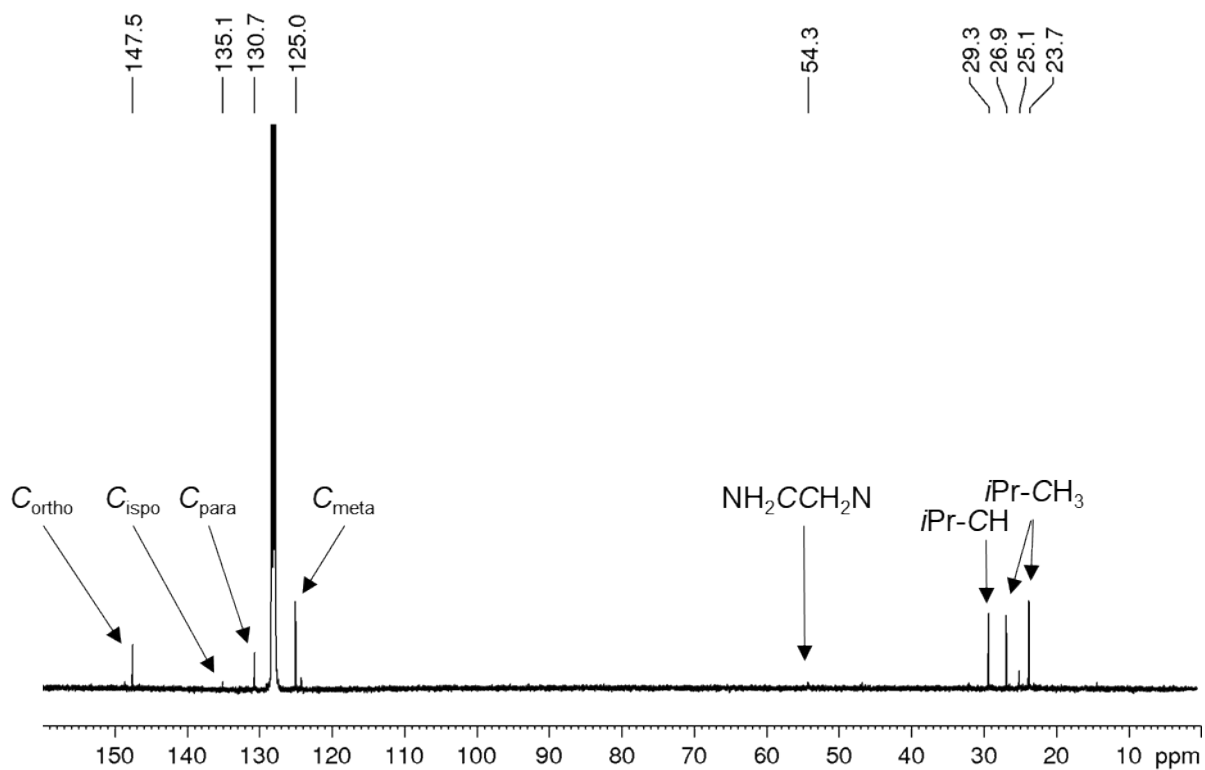

**Figure S6:**  $^{13}\text{C-NMR}$  spectrum of  $[(\text{SIDipp})\text{VOCl}_3]$  **13** in  $\text{C}_6\text{D}_6$ . The carbene carbon atom was not detected.

### NMR Spectra of $[V(N-p-CH_3C_6H_4)Cl_3(IDipp)]$ **14**

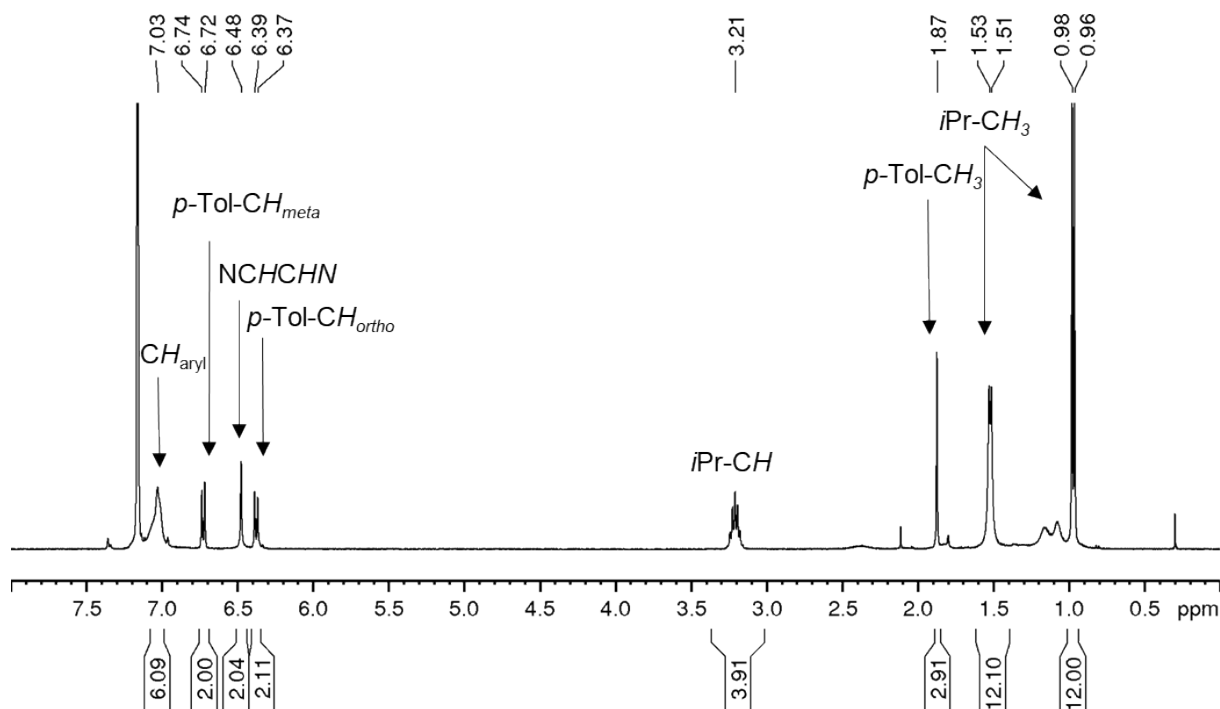

**Figure S7:**  $^1H$ -NMR spectrum of  $[V(N-p-CH_3C_6H_4)Cl_3(IDipp)]$  **14** in  $C_6D_6$ .

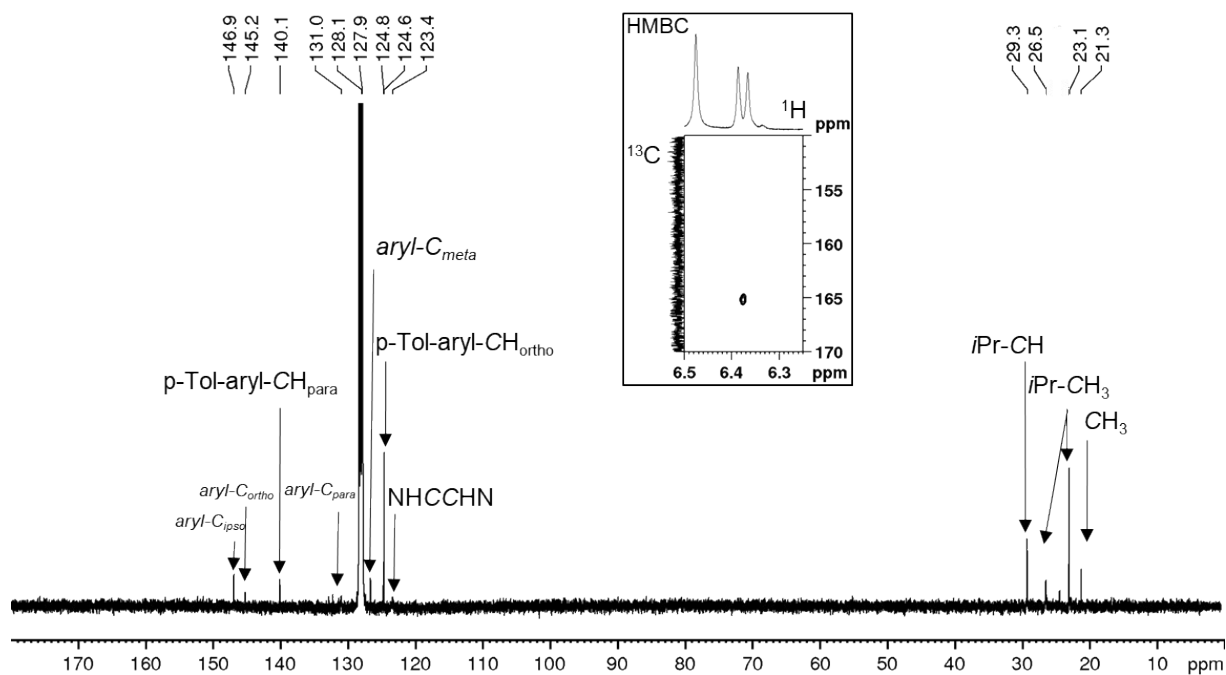

**Figure S8:**  $^{13}C\{^1H\}$ -NMR spectrum of  $[V(N-p-CH_3C_6H_4)Cl_3(IDipp)]$  **14** in  $C_6D_6$ . The carbon resonances for  $p-Tol-aryl-CH_{meta}$  at 127.7 ppm coincides with the solvent resonances. The  $p-Tol-aryl-C_{ipso}$  resonances at 165.1 ppm were resolved with HMBC experiments. The carbene carbon atom was not detected.

### NMR Spectra of $[V(N-p\text{-FC}_6\text{H}_4)\text{Cl}_3(\text{IDipp})]$ **15**

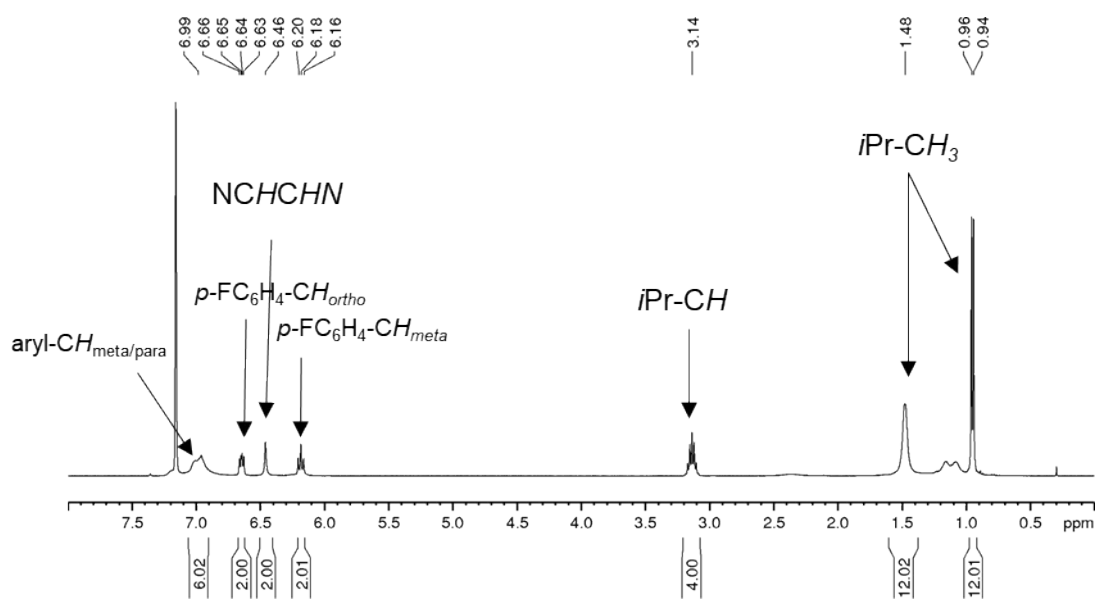

**Figure S9:**  $^1\text{H}$  NMR spectrum of  $[V(N-p\text{-FC}_6\text{H}_4)\text{Cl}_3(\text{IDipp})]$  **15** in  $\text{C}_6\text{D}_6$ .

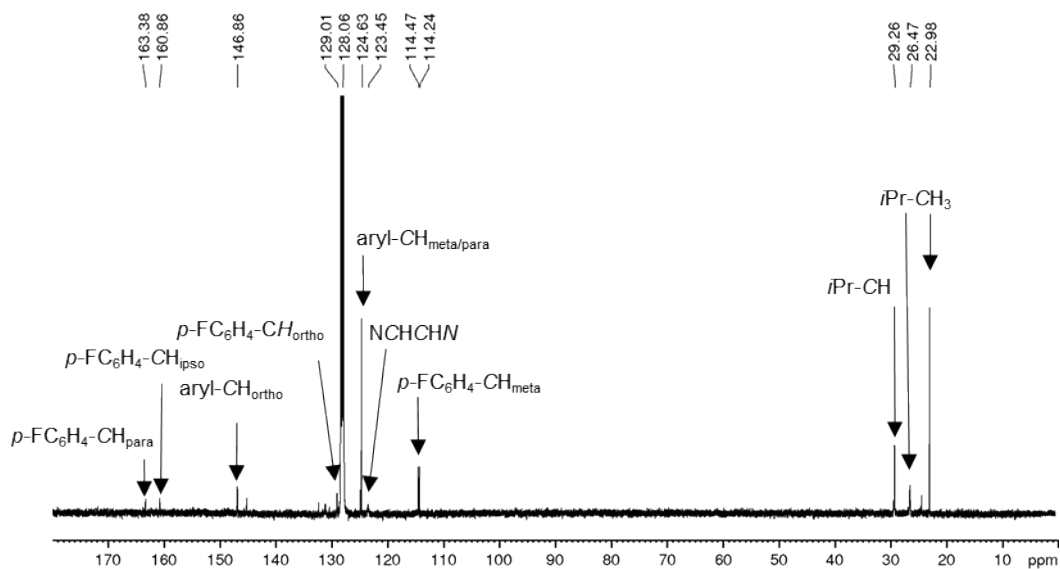

**Figure S10:**  $^{13}\text{C}\{^1\text{H}\}$  NMR spectrum of  $[V(N-p\text{-FC}_6\text{H}_4)\text{Cl}_3(\text{IDipp})]$  **15** in  $\text{C}_6\text{D}_6$ . The resonance for the carbene carbon atom was not detected.

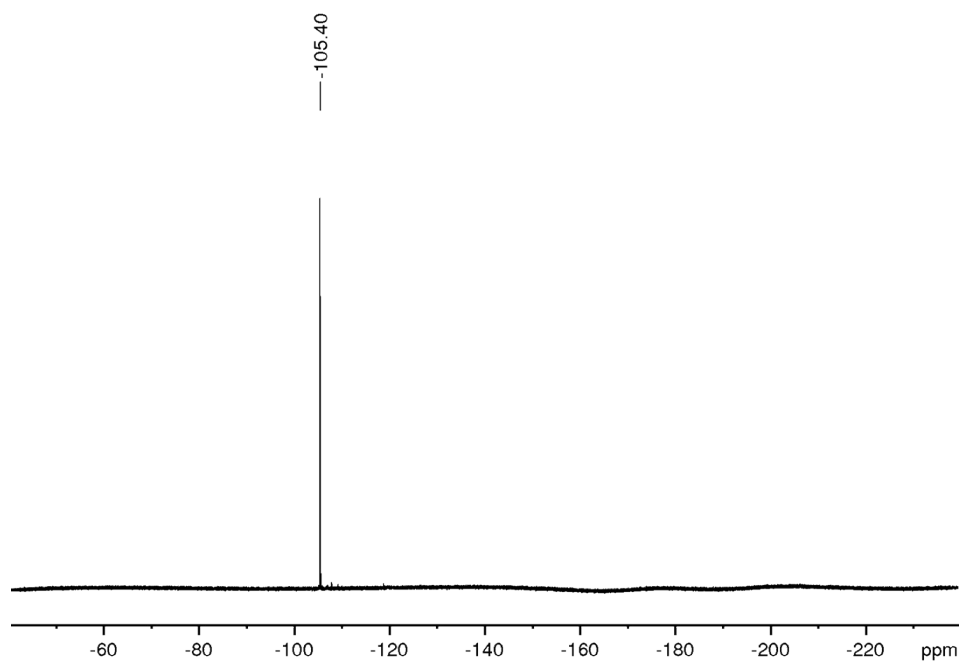

Figure S11:  $^{19}\text{F}\{^1\text{H}\}$  NMR spectrum of  $[\text{V}(\text{N-}p\text{-FC}_6\text{H}_4)\text{Cl}_3(\text{IDipp})]$  **15** in  $\text{C}_6\text{D}_6$ .

NMR Spectra of  $[\text{V}(\text{N-}p\text{-CH}_3\text{C}_6\text{H}_4)\text{Cl}_3(\text{SIDipp})]$  **16**

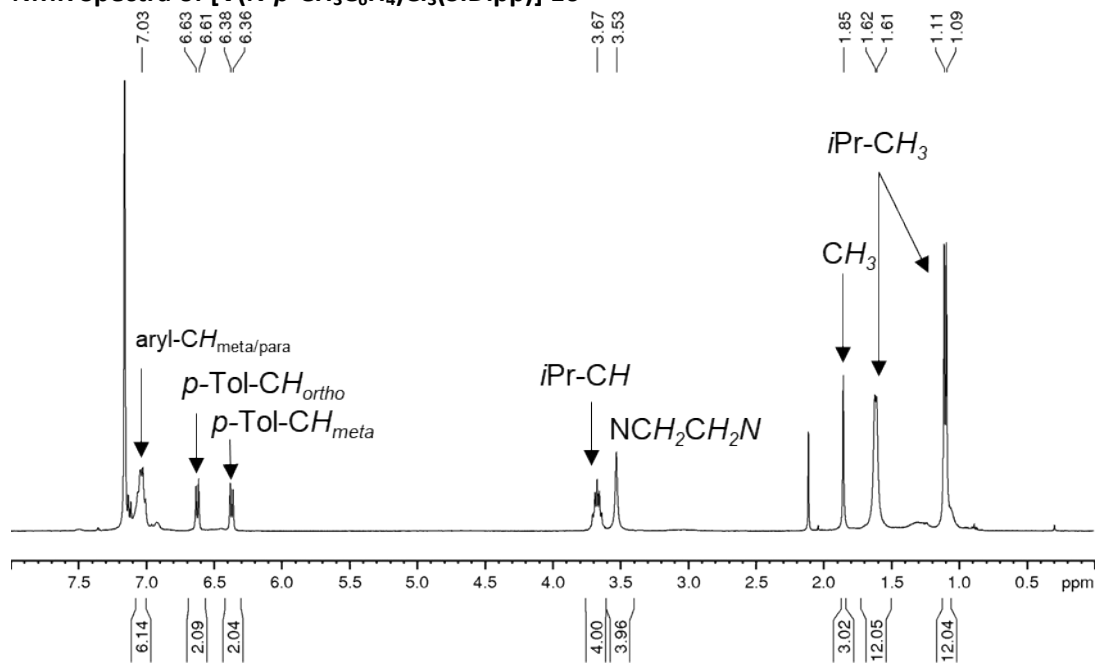

Figure S12:  $^1\text{H}$ -NMR spectrum of  $[\text{V}(\text{N-}p\text{-CH}_3\text{C}_6\text{H}_4)\text{Cl}_3(\text{SIDipp})]$  **16** in  $\text{C}_6\text{D}_6$

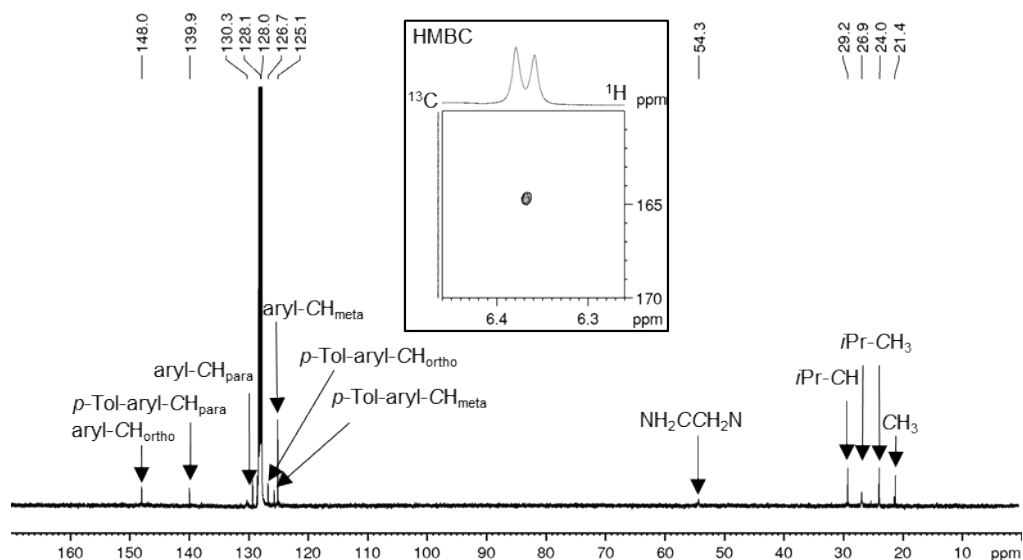

**Figure S13:**  $^{13}\text{C}\{^1\text{H}\}$ -NMR spectrum of  $[\text{V}(\text{N}-p\text{-CH}_3\text{C}_6\text{H}_4)\text{Cl}_3(\text{SiDipp})]$  **16** in  $\text{C}_6\text{D}_6$ . The resonances for the aryl- $\text{C}_{\text{ipso}}$  and the carbene carbon atom were not detected. One resonance at 127.8 ppm for (*p*-tolyl-aryl- $\text{C}_{\text{ortho}}$ ) coincides with the solvent signals.

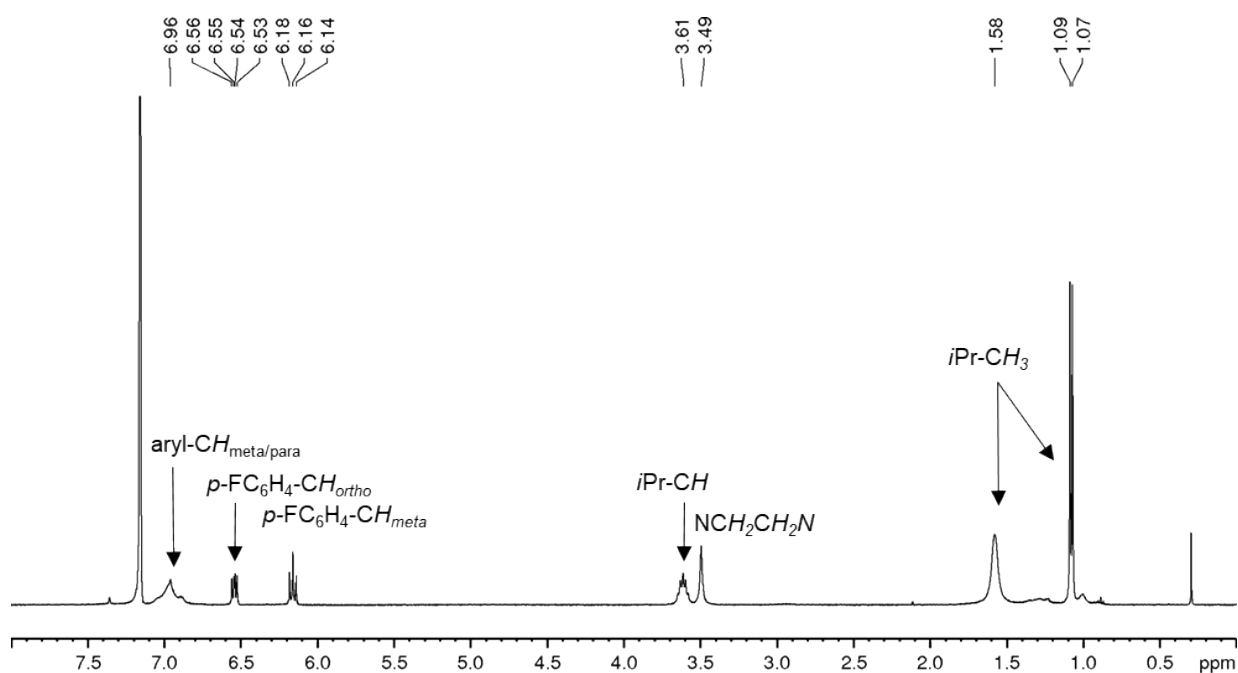

**Figure S14:**  $^1\text{H}$ -NMR spectrum of  $[\text{V}(\text{N}-p\text{-FC}_6\text{H}_4)\text{Cl}_3(\text{SiDipp})]$  **17** in  $\text{C}_6\text{D}_6$ .



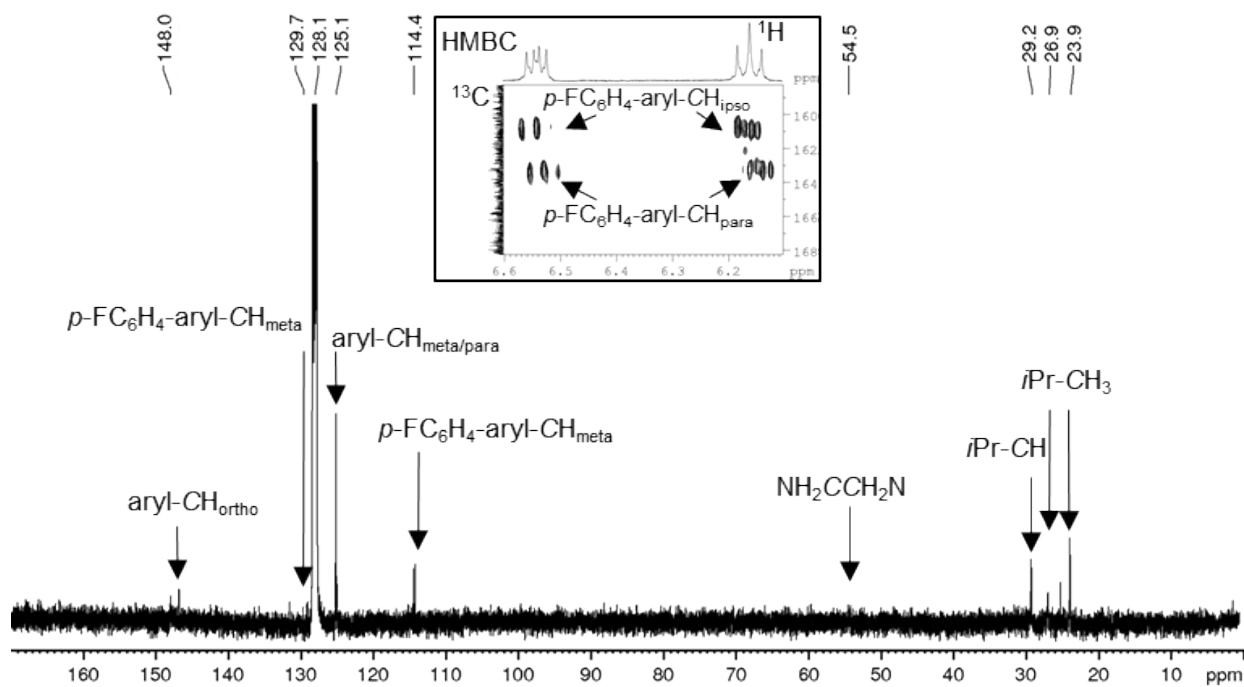

**Figure S15:**  $^{13}\text{C}\{^1\text{H}\}$ -NMR spectrum of  $[\text{V}(\text{N}-p\text{-FC}_6\text{H}_4)\text{Cl}_3(\text{SIDipp})]$  **17** in  $\text{C}_6\text{D}_6$ . The resonance for the carbene carbon atom and the aryl- $\text{C}_{\text{ipso}}$  were not detected.

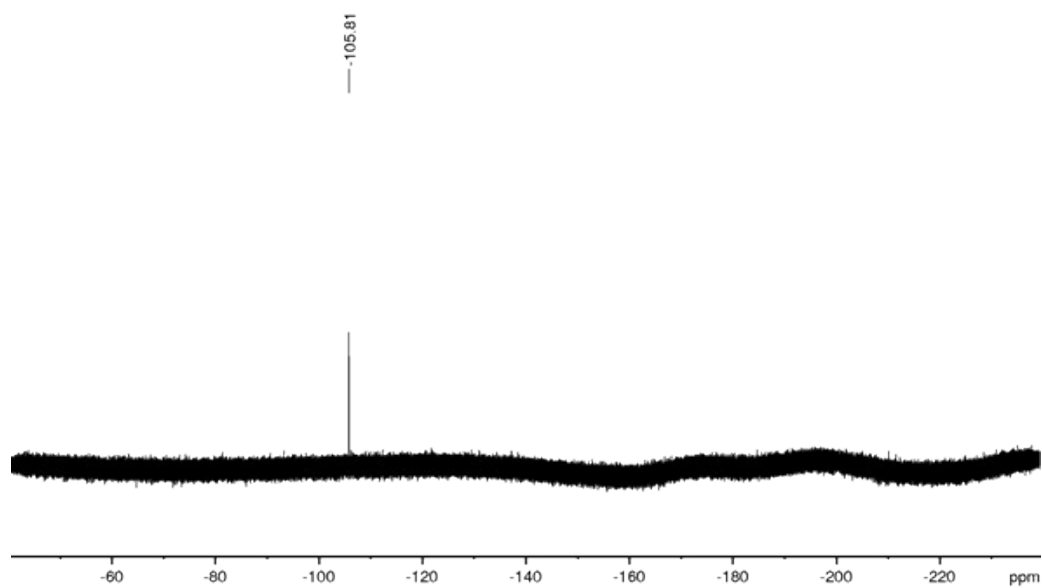

**Figure S16:**  $^{19}\text{F}\{^1\text{H}\}$ -NMR spectrum of  $[\text{V}(\text{N}-p\text{-FC}_6\text{H}_4)\text{Cl}_3(\text{SIDipp})]$  **17** in  $\text{C}_6\text{D}_6$ .

NMR Spectra of  $[V(N-p-CH_3C_6H_4)Cl_3(IMEs)]$  **18**

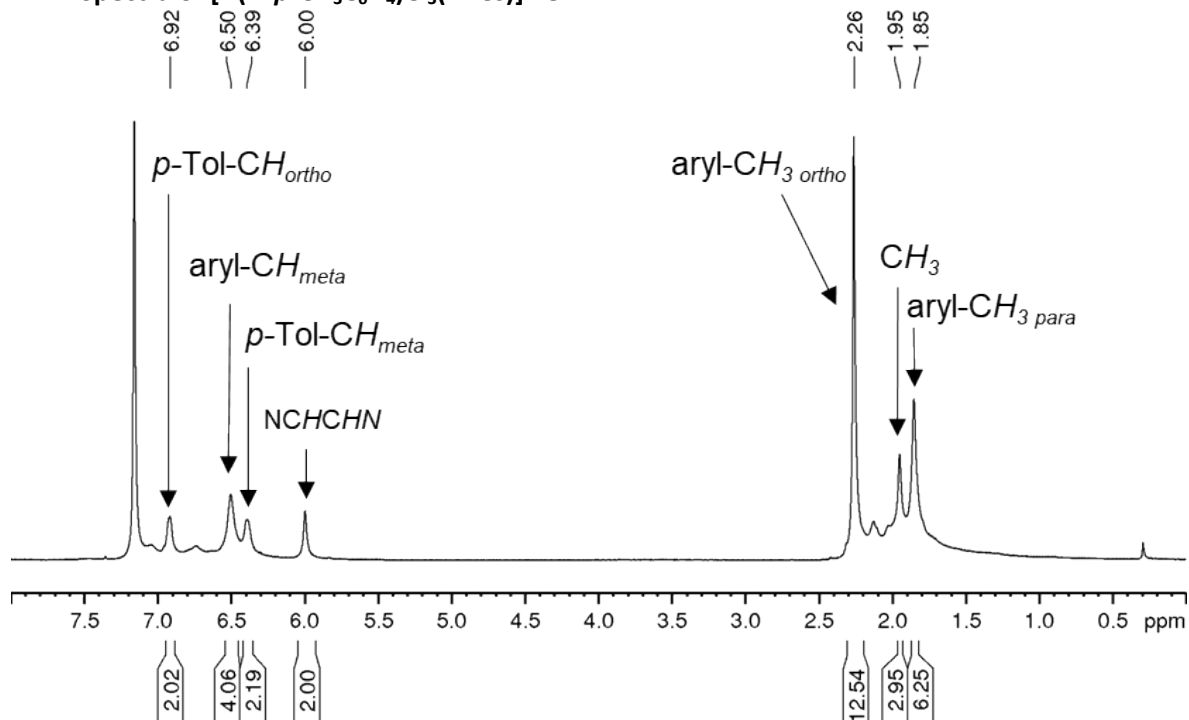

Figure S17:  $^1H$ -NMR spectrum of  $[V(N-p-CH_3C_6H_4)Cl_3(IMEs)]$  **18** in  $C_6D_6$ .

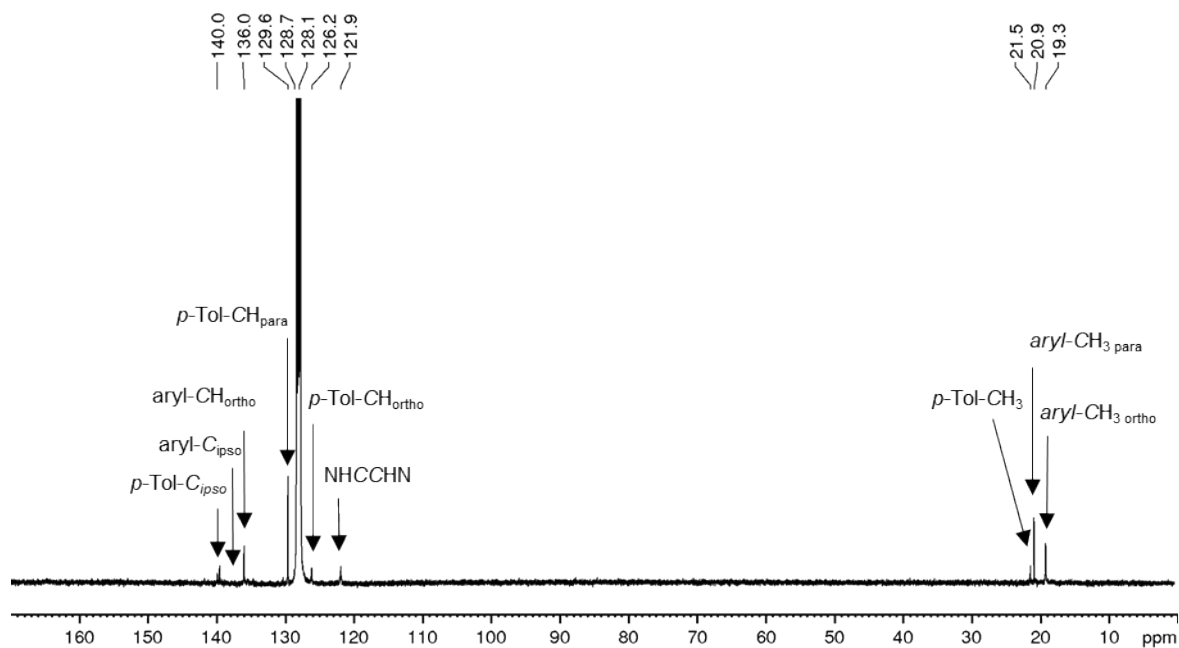

Figure S18:  $^{13}C\{^1H\}$ -NMR spectrum of  $[V(N-p-CH_3C_6H_4)Cl_3(IMEs)]$  **18** in  $C_6D_6$ . The resonance for the carbene carbon atom could not be detected. Resonances at 128.0 ppm ( $aryl-C_{para}$ ) and 128.7 ppm ( $p-Tol-$ ) coincide with the solvent signals and were determined *via* HMBC.

NMR Spectra of  $[V(N-p\text{-FC}_6\text{H}_4)\text{Cl}_3(\text{IMes})]$  **19**

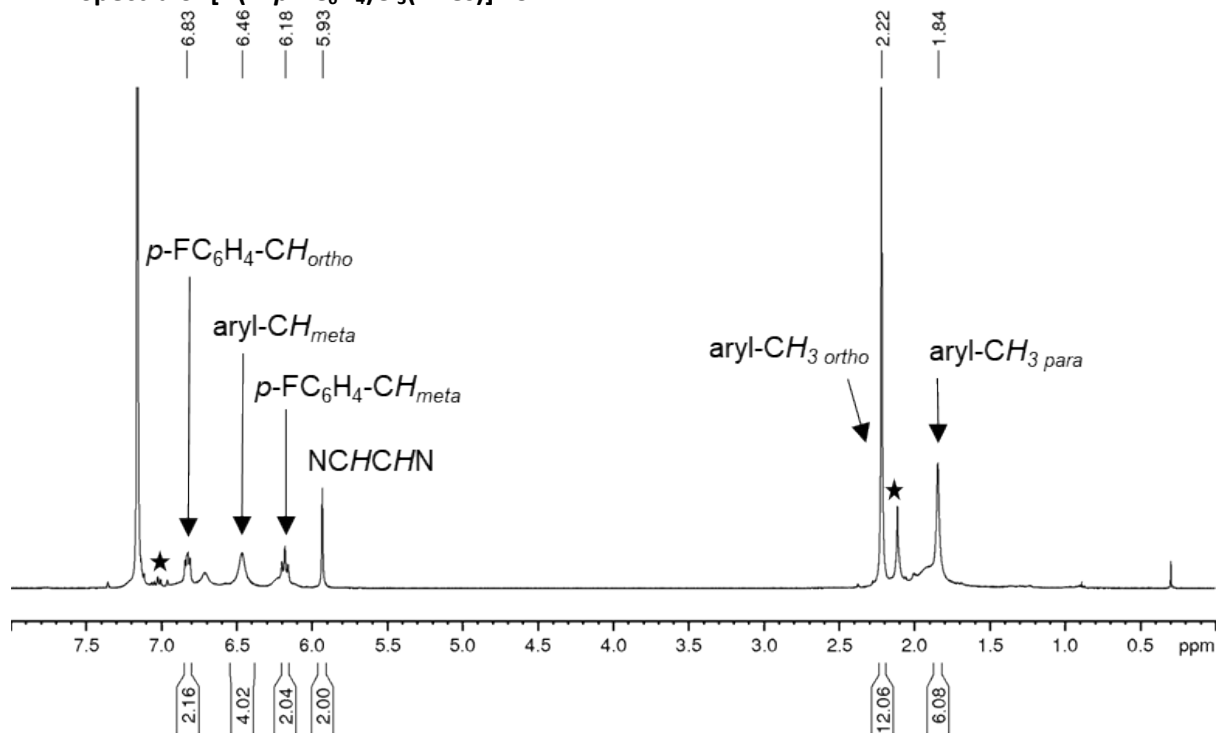

**Figure S19:**  $^1\text{H}$ -NMR spectrum of  $[V(N-p\text{-FC}_6\text{H}_4)\text{Cl}_3(\text{IMes})]$  **19** in  $\text{C}_6\text{D}_6$ . Residual traces of toluene are marked with a black asterisk.

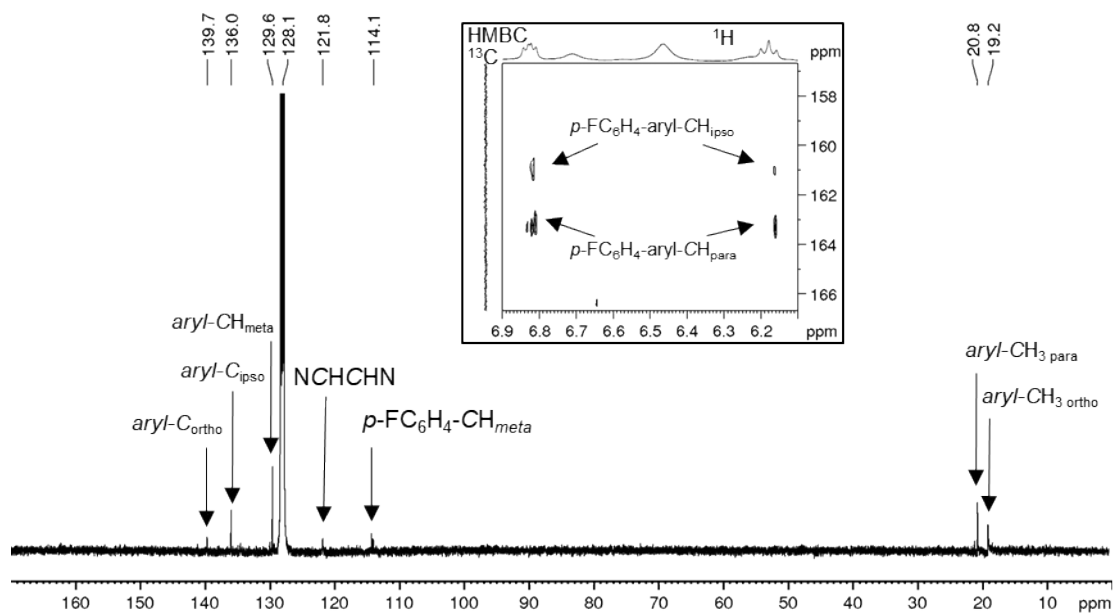

**Figure S20:**  $^{13}\text{C}\{^1\text{H}\}$ -NMR spectrum of  $[V(N-p\text{-FC}_6\text{H}_4)\text{Cl}_3(\text{IMes})]$  **19** in  $\text{C}_6\text{D}_6$ .

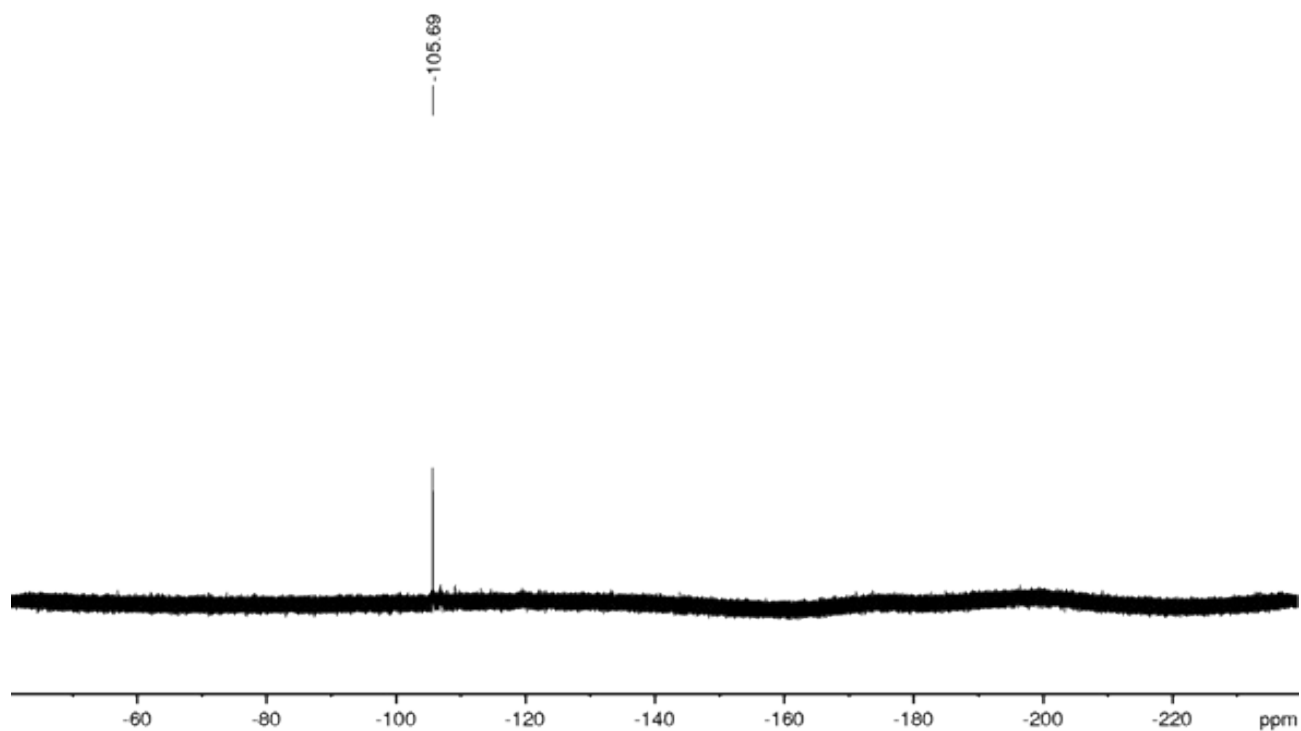

Figure S21:  $^{19}\text{F}\{^1\text{H}\}$  NMR spectrum of  $[\text{V}(\text{N}-p\text{-FC}_6\text{H}_4)\text{Cl}_3(\text{IMes})]$  **19** in  $\text{C}_6\text{D}_6$ .

NMR spectra of  $[(\text{iPr})-p\text{-CH}_3\text{C}_6\text{H}_4\text{NCO}]$  **20**

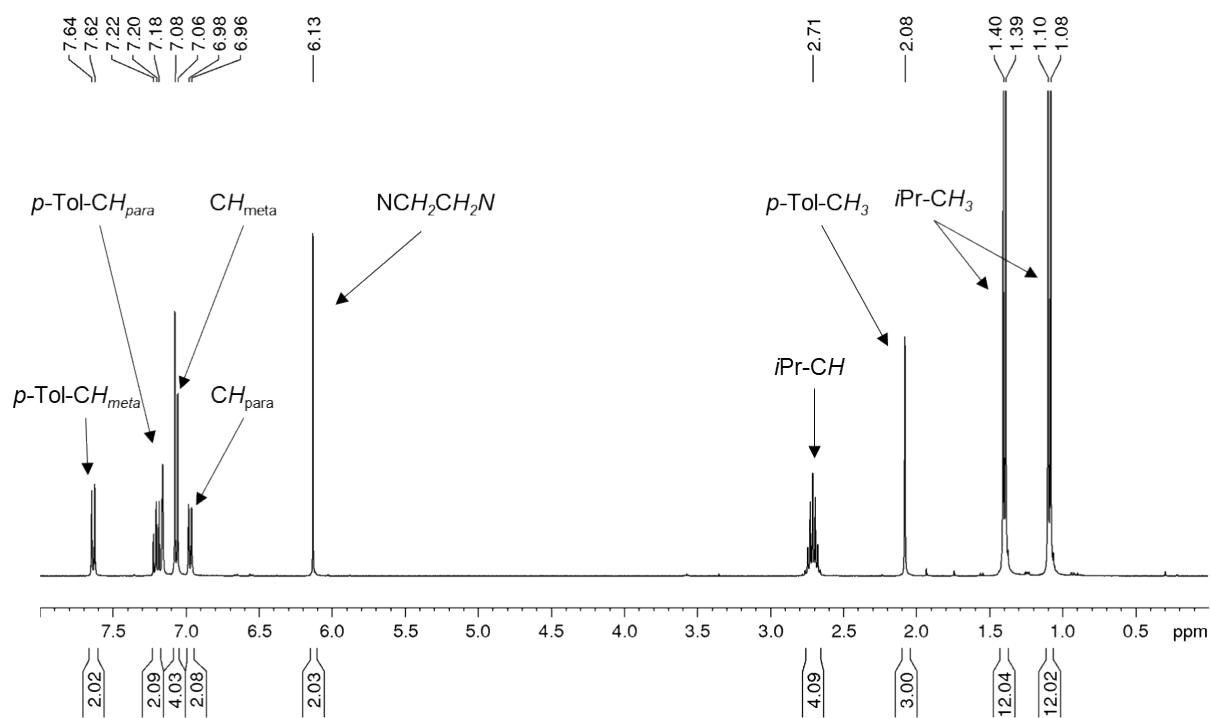

Figure S22:  $^1\text{H}$ -NMR spectrum of  $[(\text{iPr})-p\text{-CH}_3\text{C}_6\text{H}_4\text{NCO}]$  **20** in  $\text{C}_6\text{D}_6$ .

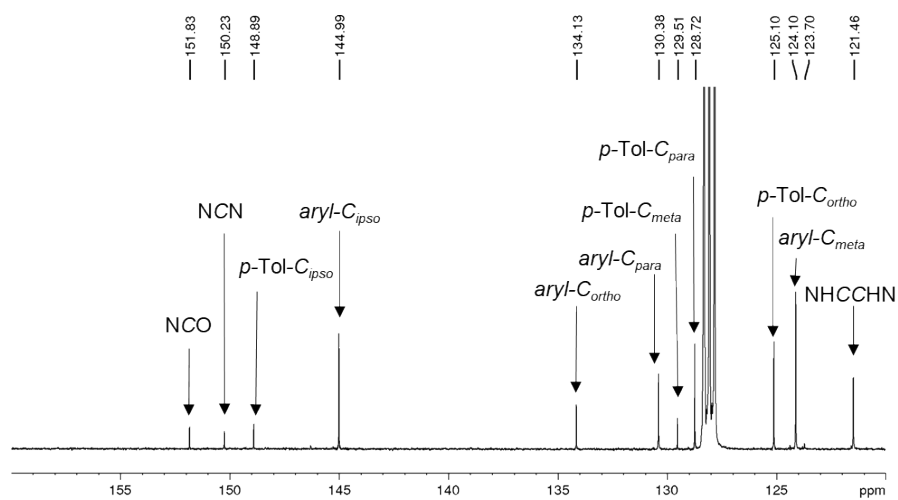

Figure S23:  $^{13}\text{C}$ -NMR spectrum of [(IPr)-  $p\text{-CH}_3\text{C}_6\text{H}_4\text{NCO}$ ] **20** in  $\text{C}_6\text{D}_6$  (part 1).

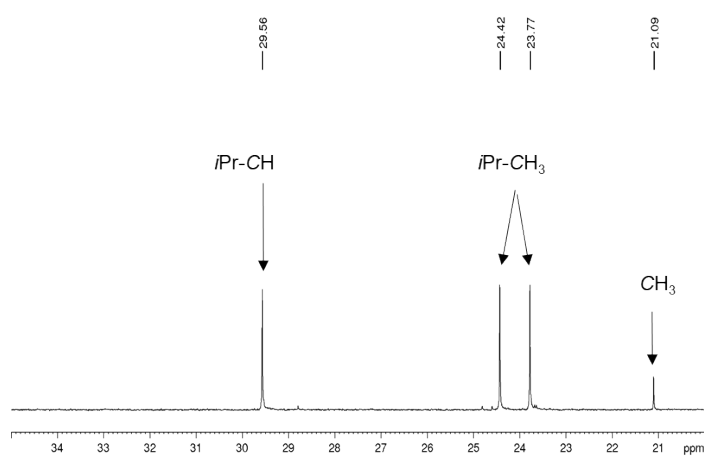

Figure S24:  $^{13}\text{C}$ -NMR spectrum of [(IPr)-  $p\text{-CH}_3\text{C}_6\text{H}_4\text{NCO}$ ] **20** in  $\text{C}_6\text{D}_6$  (part 2).

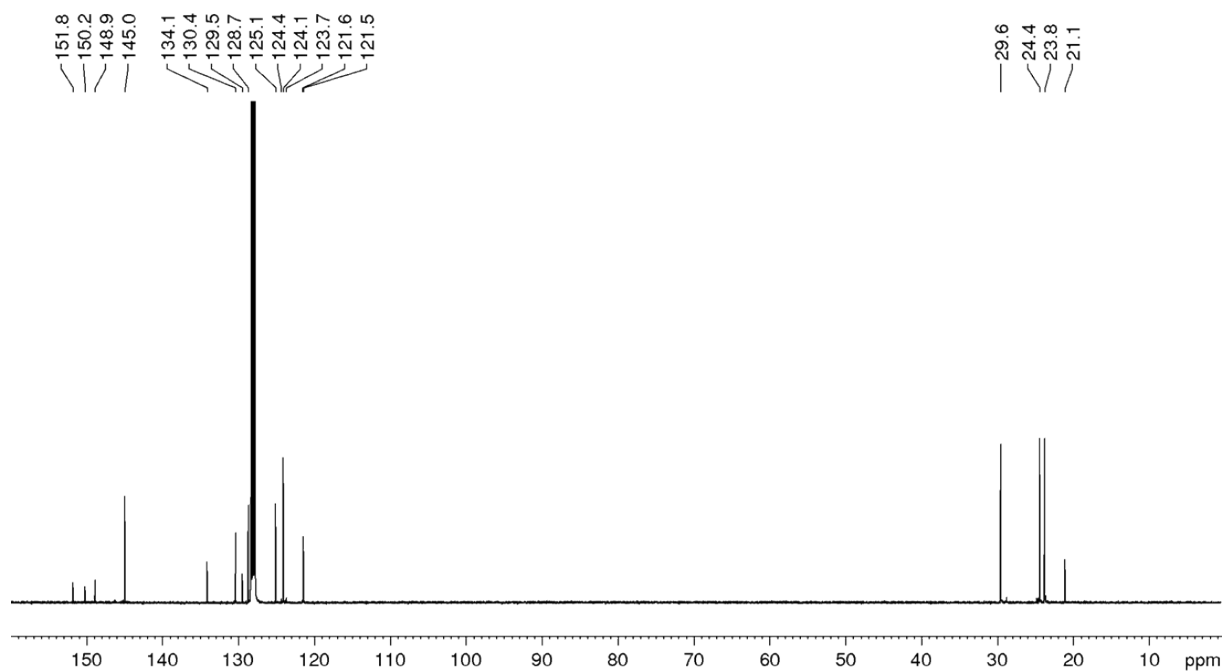

Figure S25: Full  $^{13}\text{C}$ -NMR spectrum of [(IPr)-  $p\text{-CH}_3\text{C}_6\text{H}_4\text{NCO}$ ] **20** in  $\text{C}_6\text{D}_6$ .

## 2) Crystal structures of the compounds

### Crystal structure of $[\text{VCl}_3(\text{cAAC}^{\text{Me}})]$ **1**

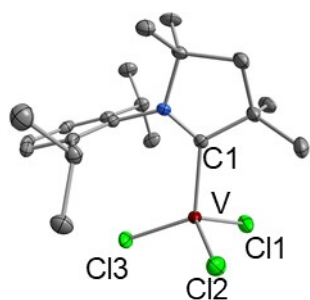

**Figure S26:** Molecular structure of  $[\text{VCl}_3(\text{cAAC}^{\text{Me}})]$  **1** in the solid state. Hydrogen atoms are omitted for clarity. Atomic displacement ellipsoids are set at 50 % probability. Selected bond lengths [Å] and angles [°] for **1**: V–C1 2.1179(13), V–Cl1 2.2195(3), V–Cl2 2.2042(5), V–Cl3 2.21122(5), N–C1 1.3029(16), C1–V–Cl1 98.83(4), C1–V–Cl2 105.73(4); C1–V–Cl3 117.72(4); Cl1–V–Cl2 114.254 (17), Cl2–V–Cl3 111.431(16), Cl3–V–Cl1 108.488(16).

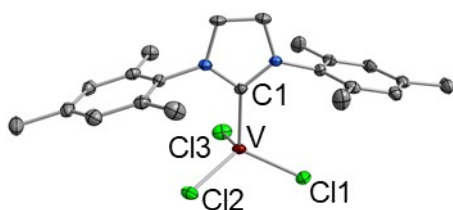

### Crystal structure of $[\text{VCl}_3(\text{IMes})]$ **2**

**Figure S27:** Molecular structure of  $[\text{VCl}_3(\text{IMes})]$  **2** in the solid state. Hydrogen atoms are omitted for clarity. Atomic displacement ellipsoids are set at 50 % probability. Selected bond lengths [Å] and angles [°] for **2**: V–C1 2.112(3), V–Cl1 2.2142(9), V–Cl2 2.2098(9), V–Cl3 2.2084(10), C1–V–Cl1 107.99(8), C1–V–Cl2 108.86(8); C1–V–Cl3 104.51(9); Cl1–V–Cl2 110.62(4), Cl2–V–Cl3 111.32(4), Cl3–V–Cl1 113.23(4).

### Crystal structure of $\{[VCl_2(l\text{iPr}_2\text{Me})(\mu\text{-Cl})]_2\} \mathbf{3}$

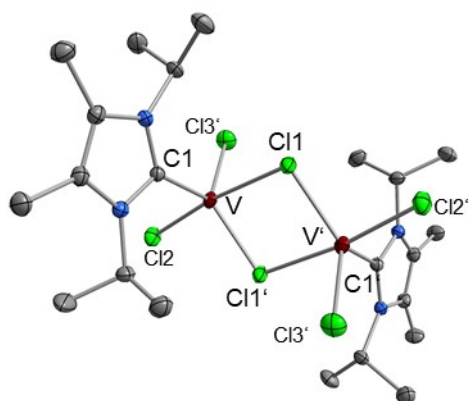

**Figure S28:** . Molecular structure of  $\{[VCl_2(l\text{iPr}_2\text{Me})(\mu\text{-Cl})]_2\} \mathbf{3}$  in the solid state. Hydrogen atoms and a co-crystallized solvent molecule of toluene in **3** are omitted for clarity. Atomic displacement ellipsoids are set at 50 % probability. Selected bond lengths [Å] and angles [°] for **3**: V–C1/C1' 2.1191(20), V–Cl1/Cl1' 2.5362(6)/2.3282(6), V–Cl2/Cl2' 2.2454(6), V–Cl3/Cl3' 2.2630(6), C1–V–Cl1 83.76(5), C1–V–Cl1' 119.50(5), C1–V–Cl2 112.29(5), C1–V–Cl3 98.34(5), Cl1–V–Cl1' 79.168(9), Cl1–V–Cl2 172.71(2), Cl1'–V–Cl2' 88.43(2), Cl1'–V–Cl3 93.77(2), Cl3–V–Cl2 97.16(2).

### Crystal structure of $[VCl_3(\text{IDipp})] \mathbf{4}$

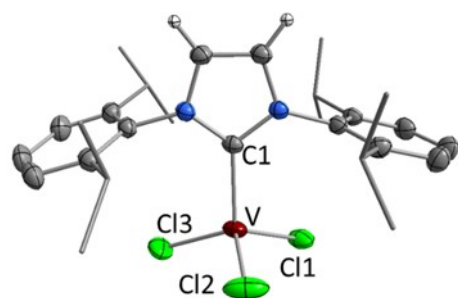

**Figure S29:** Molecular structure of  $[VCl_3(\text{IDipp})] \mathbf{4}$  in the solid state. Hydrogen atoms, except for the NHC backbone hydrogen atoms (idealized calculated positions; ball-stick model) are omitted for clarity. Atomic displacement ellipsoids are set at 50 % probability. Selected bond lengths [Å] and angles [°] for **4**: V–C1 2.1230(17), V–Cl1 2.2038(5), V–Cl2 2.2073(6), V–Cl3 2.2034(7), C1–V–Cl1 110.52(5), C1–V–Cl2 103.33(4), C1–V–Cl3 110.74(5), Cl1–V–Cl2 110.75(3), Cl2–V–Cl3 110.06(3), Cl3–V–Cl1 111.19(2).

### Crystal structure of $[\text{VCl}_3(\text{SIDipp})]$ **5**

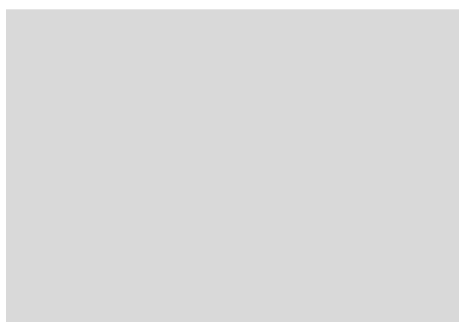

**Figure S30:** Molecular structure of  $[\text{VCl}_3(\text{SIDipp})]$  **5** in the solid state. Hydrogen atoms, except for the NHC backbone hydrogen atoms (idealized calculated positions; ball-stick model) are omitted for clarity. Atomic displacement ellipsoids are set at 50 % probability. Selected bond lengths [ $\text{\AA}$ ] and angles [ $^\circ$ ] for **5**: V–C1 2.1339(18), V–Cl1 2.2106(7), V–Cl2 2.2105(6), V–Cl3 2.2062(5), C1–V–Cl1 112.38(5), C1–V–Cl2 102.12(5); C1–V–Cl3 110.26(5); Cl1–V–Cl2 110.51(2), Cl2–V–Cl3 111.86(2), Cl3–V–Cl1 109.56(2).

### Crystal structure of $[\text{VCl}_3(\text{cAAC}^{\text{Me}})_2]$ **7**

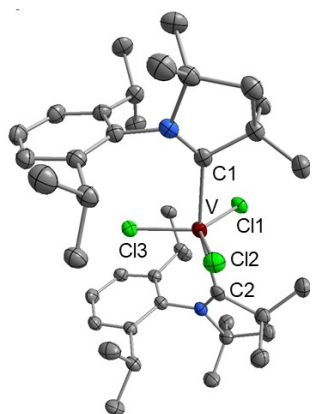

**Figure S31:** Molecular structure of  $[\text{VCl}_3(\text{cAAC}^{\text{Me}})_2]$  **7** in the solid state. Hydrogen atoms and 1.5 co-crystallized solvent molecules of benzene are omitted for clarity. Atomic displacement ellipsoids are set at 50 % probability. Selected bond lengths [ $\text{\AA}$ ] and angles [ $^\circ$ ] for **7**: V–C1 2.276(24), V–C2 2.2896(24), V–Cl1 2.2873(4), V–Cl2 2.2672(6), V–Cl3 2.2222(6), C1–V–C2 162.27(7), C1–V–Cl1 92.35(5), C1–V–Cl2 81.07(5), C1–V–Cl3 98.27(5), C2–V–Cl1 81.73(5), C2–V–Cl2 91.38(5), C2–V–Cl3 99.43(5), Cl1–V–Cl2 135.30(2); Cl2–V–Cl3 112.12(2), Cl3–V–Cl1 112.57(2).



### Crystal structure of $[\text{VCl}_3(\text{I}i\text{PrMe})_2]$ **8**

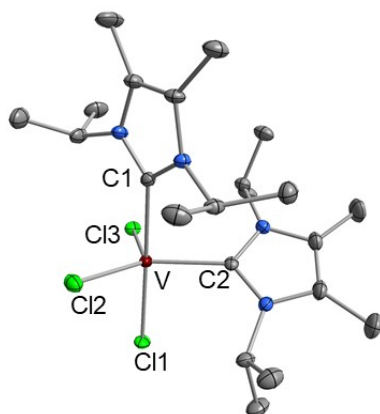

**Figure S32:** Molecular structure of Selected bond lengths [ $\text{\AA}$ ] and angles [ $^\circ$ ] for  $[\text{VCl}_3(\text{I}i\text{PrMe})_2]$  **8** in the solid state. Hydrogen atoms are omitted for clarity. Atomic displacement ellipsoids are set at 50 % probability. Selected bond lengths [ $\text{\AA}$ ] and angles [ $^\circ$ ] for **8**: V–C1 2.255(2), V–C2 2.160(2), V–Cl1 2.3548(6), V–Cl2 2.2818(6), V–Cl3 2.2843(6), C1–V–C2 86.77(7), C1–V–Cl1 173.46(5), C1–V–Cl2 81.35(5), C1–V–Cl3 96.39(5), C2–V–Cl1 93.58(5), C2–V–Cl2 127.81(6), Cl2–V–Cl3 124.90(2), Cl3–V–C2 106.79(6) Cl1–V–Cl2 93.33(2), Cl1–V–Cl3 89.77(2).

### Crystal structure of $[\text{VCl}_3(\text{cAAC}^{\text{Me}})(\text{THF})]$ **1(thf)**

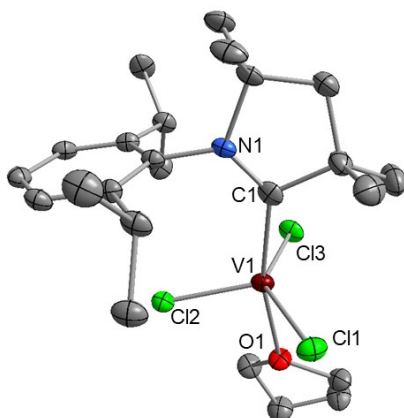

**Figure S33:** Molecular structure of  $[\text{VCl}_3(\text{cAAC}^{\text{Me}})(\text{THF})]$  **1(thf)** in the solid state. Hydrogen atoms are omitted for clarity. Atomic displacement ellipsoids are set at 50 % probability. Selected bond lengths [ $\text{\AA}$ ] and angles [ $^\circ$ ] for **1(thf)**: C1–V1 2.1741(59), O1–V1 2.1921(45), Cl1–V1 2.2664(17), C1–N1 1.3107(79), Cl2–V1 2.2273(17), Cl3–V1 2.2630(16), C1–V1–O1 165.2(2), C1–V1–Cl1 91.55(17), C1–V1–Cl2 105.95(17), C1–V1–Cl3 88.34(17), Cl1–V1–Cl2 111.28(7), Cl2–V1–Cl3 109.61(7), Cl3–V1–Cl1 137.42(7), O1–V1–Cl1 83.71(12), O1–V1–Cl2 88.87(12), O1–V1–Cl3 85.74(13).

### Crystal structure of $[\text{VCl}_3(\text{SIDipp})(\text{THF})]$ **5(thf)**

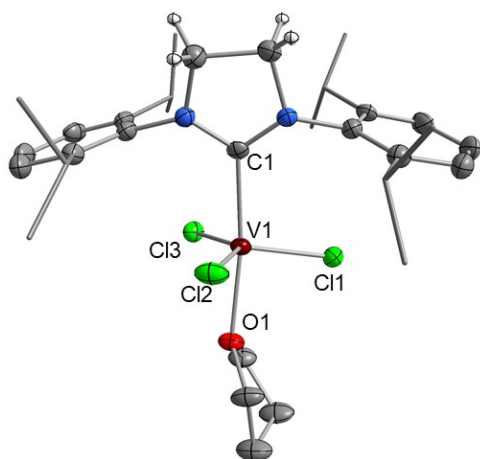

**Figure S34:** Molecular structure of  $[\text{VCl}_3(\text{SIDipp})(\text{THF})]$  **5(thf)** in the solid state. Hydrogen atoms are omitted for clarity. Atomic displacement ellipsoids are set at 50 % probability. Selected bond lengths [ $\text{\AA}$ ] and angles [ $^\circ$ ] for **5(thf)**: C1–V1 2.2129(33), O1–V1 2.1873(27), Cl1–V1 2.2298(10), Cl2–V1 2.2580(11), Cl3–V1 2.2386(10), C1–V1–O1 167.68(12), C1–V1–Cl1 102.95(9), C1–V1–Cl2 82.92(10), C1–V1–Cl3 97.42(9), O1–V1–Cl1 86.48(8), O1–V1–Cl2 85.66(8), O1–V1–Cl3 87.14(8), Cl1–V1–Cl2 117.85(4), Cl2–V1–Cl3 133.69(4), Cl3–V1–Cl1 107.23(4).

### Crystal structure of $[\text{MesVCl}_2(\text{cAAC}^{\text{Me}})]$ **9**

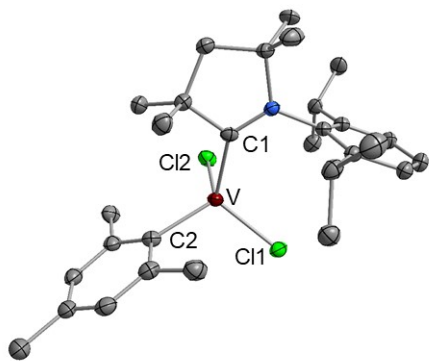

**Figure S35:** Molecular structure of  $[\text{MesVCl}_2(\text{cAAC}^{\text{Me}})]$  **9** in the solid state. Hydrogen atoms are omitted for clarity. Atomic displacement ellipsoids are set at 50 % probability. Selected bond lengths [ $\text{\AA}$ ] and angles [ $^\circ$ ] for **9**: V–C1 2.1281(18), V–C2 2.0779(23), V–Cl1 2.2367(4), V–Cl2 2.2369(6), N–C1 1.3071(24), C1–V–C2 114.77(7), C1–V–Cl1 112.97(5), C1–V–Cl2 93.03(5), C2–V–Cl1 109.69(5), C2–V–Cl2 112.41(5), Cl1–V–Cl2 113.20(2).

### Crystal structure of $[\text{cAAC}^{\text{Me}}\text{H}]^+[\text{VCl}_2(\text{Mes})_2]^-$ **10**

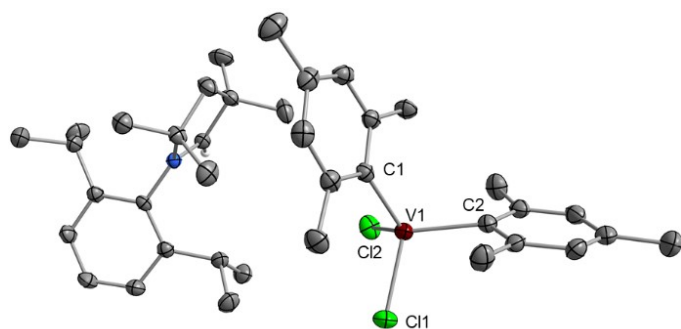

**Figure S36:** Molecular structure of  $[\text{cAAC}^{\text{Me}}\text{H}]^+[\text{VCl}_2(\text{Mes})_2]^-$  **10** in the solid state. Hydrogen atoms are omitted for clarity. Atomic displacement ellipsoids are set at 50 % probability. Selected bond lengths [Å] and angles [°] for **10**: C1–V1 2.0920(18), C2–V1 2.0895(23), Cl1–V1 2.2796(5), Cl2–V1 2.2856(6), C1–V1–C2 109.43(17), C1–V1–Cl1 116.86(5), C1–V1–Cl2 108.19(5), C2–V1–Cl1 106.32(5), C2–V1–Cl2 117.83(6), Cl1–V1–Cl2 98.23(2).

### Crystal structure of $[(\text{NPh}_2)\text{VCl}_2(\text{cAAC}^{\text{Me}})]$ **11**

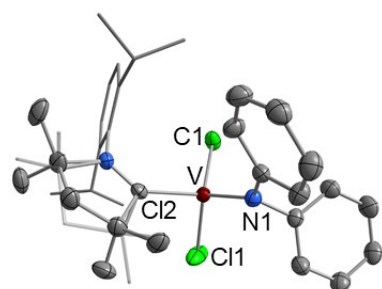

**Figure S37:** Molecular structure of  $[(\text{NPh}_2)\text{VCl}_2(\text{cAAC}^{\text{Me}})]$  **11** in the solid state. Hydrogen atoms are omitted for clarity. Atomic displacement ellipsoids are set at 50 % probability. Selected bond lengths [Å] and angles [°] for **11** (the five membered ring of the  $\text{cAAC}^{\text{Me}}$ -ligand showed disorder in the  $\text{CH}_2$  position and is also displayed): V–C1 2.1411(21), V–N1 1.8832(15), V–Cl1 2.2625(5), V–Cl2 2.2258(6), C1–V–N1 106.28(6), C1–V–Cl1 102.48(5), C1–V–Cl2 113.01(5), N1–V–Cl1 110.75(5), N1–V–Cl2 109.66(5), Cl1–V–Cl2 114.23(3).

### Crystal structure of [V(O)Cl<sub>3</sub>(IDipp)] **12**

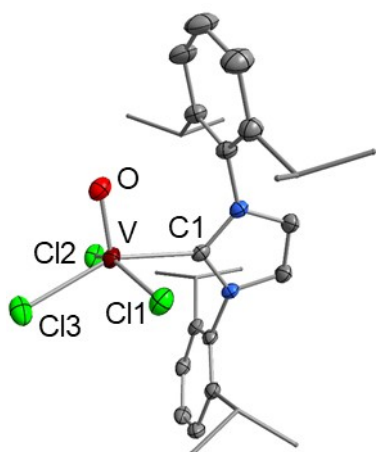

**Figure S38:** Molecular structure of [V(O)Cl<sub>3</sub>(IDipp)] **12** in the solid state. Hydrogen atoms are omitted for clarity. Atomic displacement ellipsoids are set at 50 % probability. Selected bond lengths [Å] and angles [°] for **12**: V–C1 2.1582(13), V–O 1.566(1), V–Cl1 2.2405(5), V–Cl2 2.2164(5), V–Cl3 2.2628(5), C1–V–O 100.00(5), C1–V–Cl1 79.39(4), Cl1–V–Cl2 152.411(17); C1–V–Cl3 153.14(4), Cl1–V–Cl3 90.481(16), Cl3–V–Cl2 92.865(16), Cl3–V–C1 85.46(4), O–V–Cl1 102.68(4), O–V–Cl2 102.57(4), O–V–Cl3 106.51(4).

### Crystal structure of [V(O)Cl<sub>3</sub>(SIDipp)] **13**

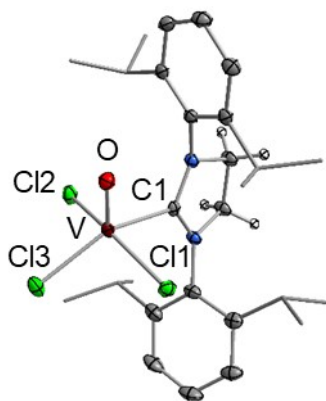

**Figure S39:** Molecular structure of [V(O)Cl<sub>3</sub>(SIDipp)] **13** in the solid state. Hydrogen atoms, except for the backbone hydrogen atoms in **13** (stick and ball representation), are omitted for clarity. Atomic displacement ellipsoids are set at 50 % probability. Selected bond lengths [Å] and angles [°] for **13**: V–C1 2.1658(13), V–O 1.5702(11), V–Cl1 2.2178(4), V–Cl2 2.2216(4), V–Cl3 2.2542(5), C1–V–O 101.40(5), C1–V–Cl1 84.25(4), C1–V–Cl2 78.36(4), Cl1–V–Cl2 152.589(17); C1–V–Cl3 148.91(4), Cl1–V–Cl3 91.814(15), Cl3–V–Cl2 92.283(15), Cl3–V–C1 78.36(4), O–V–Cl1 101.86(4), O–V–Cl2 102.23(4), O–V–Cl3 109.57(4).

### Crystal structure of [V(N-*p*-CH<sub>3</sub>C<sub>6</sub>H<sub>4</sub>)Cl<sub>3</sub>(IMes)] **18**

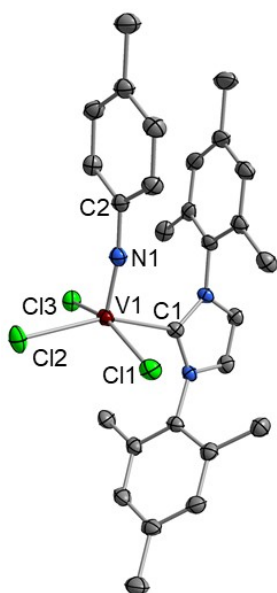

**Figure S40:** Molecular structure of [V(N-*p*-CH<sub>3</sub>C<sub>6</sub>H<sub>4</sub>)Cl<sub>3</sub>(IMes)] **18** Atomic displacement ellipsoids are set at 50 % probability. Selected bond lengths [Å] and angles [°] for [V(N-*p*-CH<sub>3</sub>C<sub>6</sub>H<sub>4</sub>)Cl<sub>3</sub>(IMes)] **18**: C1–V1 2.1666(18), V1–N1 1.6371(15), V1–Cl1 2.2602(5), V1–Cl2 2.2710(6), V1–Cl3 2.2790(5), N1–C2 1.3816(22), C1–V1–N1 99.80(7), C1–V1–Cl1 85.89(4), C1–V1–Cl2 153.95(5), C1–V1–Cl3 81.34(4), Cl1–V1–Cl2 92.805(19), Cl1–V1–Cl3 156.16(2), Cl2–V1–Cl3 89.988(19), V1–N1–C2 171.31(13).

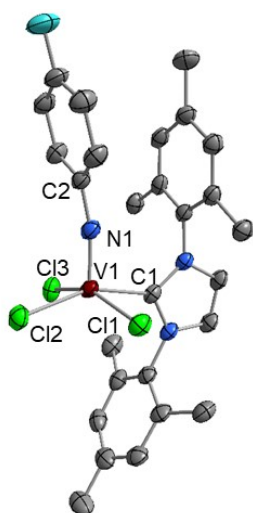

### Crystal structure of [V(N-*p*-FC<sub>6</sub>H<sub>4</sub>)Cl<sub>3</sub>(IMes)] **19**

**Figure S41:** Molecular structure of [V(N-*p*-FC<sub>6</sub>H<sub>4</sub>)Cl<sub>3</sub>(IMes)] **19** in the solid state. Hydrogen atoms and a cocrystallized solvent molecule of benzene are omitted for clarity. Atomic displacement ellipsoids are set at 50 % probability. Selected bond lengths [Å] and angles [°] for [V(N-*p*-FC<sub>6</sub>H<sub>4</sub>)Cl<sub>3</sub>(IMes)] **19**: C1–V1 2.1541(17), V1–N1 1.6338(15), V1–Cl1 2.2715(5), V1–Cl2 2.2937(6), V1–Cl3 2.2425(6), N1–C2 1.3860(21), C1–V1–N1 99.58(7), C1–V1–Cl1 82.40(5), C1–V1–Cl2 157.07(5), C1–V1–Cl3 88.24(5), Cl1–V1–Cl2 88.139(19), Cl1–V1–Cl3 154.36(2), Cl2–V1–Cl3 91.47(2), V1–N1–C2 167.20(13).

Crystal structure of [(IDipp)-*p*-ToINCO] **20**

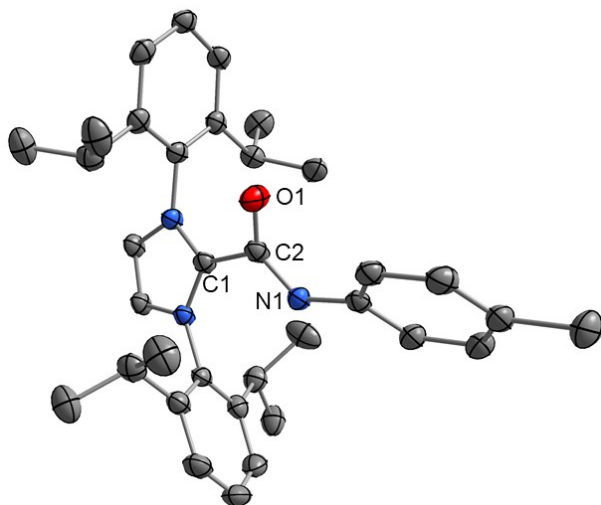

**Figure S42:** Molecular structure of [(IDipp)-*p*-ToINCO] **20** in the solid state. Hydrogen atoms are omitted for clarity. Atomic displacement ellipsoids are set at 50 % probability. Selected bond lengths [Å] and angles [°] for **20**: C1–C2 1.5161(18), C2–N1 1.3069(18), C2–O1 1.2530(17), C1–C2–O1 115.97(12), O1–C2–N1 134.10(13), N1–C2–C1 109.87(12).

### 3) UV-VIS Spectra of $[\text{VCl}_3(\text{cAAC}^{\text{Me}})]$ **1**, $[\text{VCl}_3(\text{IMes})]$ **2**, their oxidized forms and $[\text{VCl}_3(\text{cAAC}^{\text{Me}})_2]$ **7**

#### UV-VIS Spectra of $[\text{VCl}_3(\text{cAAC}^{\text{Me}})]$ **1** and $[\text{V}(\text{O})\text{Cl}_3(\text{cAAC}^{\text{Me}})]$

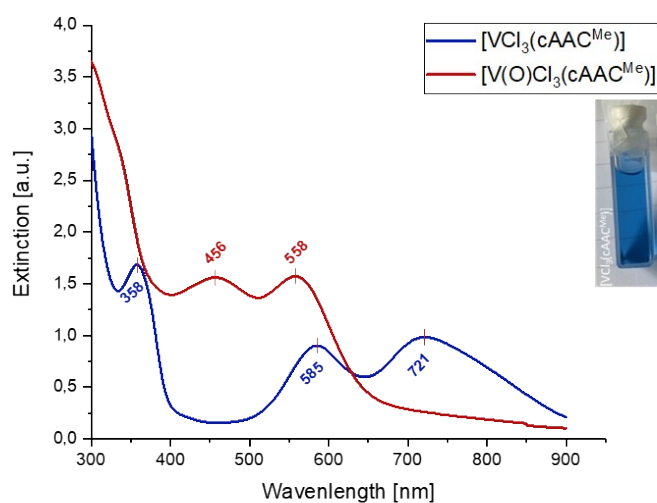

**Figure S43:** UV-VIS Spectra of  $[\text{VCl}_3(\text{cAAC}^{\text{Me}})]$  **1** (blue) and its oxidized form  $[\text{V}(\text{O})\text{Cl}_3(\text{cAAC}^{\text{Me}})]$  (red) in toluene at room temperature. Molar-extinction-coefficients of **1**:  $\epsilon_{358} = 664 \text{ L}\cdot\text{mol}^{-1}\text{cm}^{-1}$ ,  $\epsilon_{721} = 387 \text{ L}\cdot\text{mol}^{-1}\text{cm}^{-1}$ ,  $\epsilon_{358} = 664 \text{ L}\cdot\text{mol}^{-1}\text{cm}^{-1}$ . Molar-extinction-coefficients of oxidized form:  $\epsilon_{456} = 616 \text{ L}\cdot\text{mol}^{-1}\text{cm}^{-1}$ ,  $\epsilon_{558} = 620 \text{ L}\cdot\text{mol}^{-1}\text{cm}^{-1}$ .

#### UV-VIS Spectra of $[\text{VCl}_3(\text{IMes})]$ **2** and $[\text{V}(\text{O})\text{Cl}_3(\text{IMes})]$

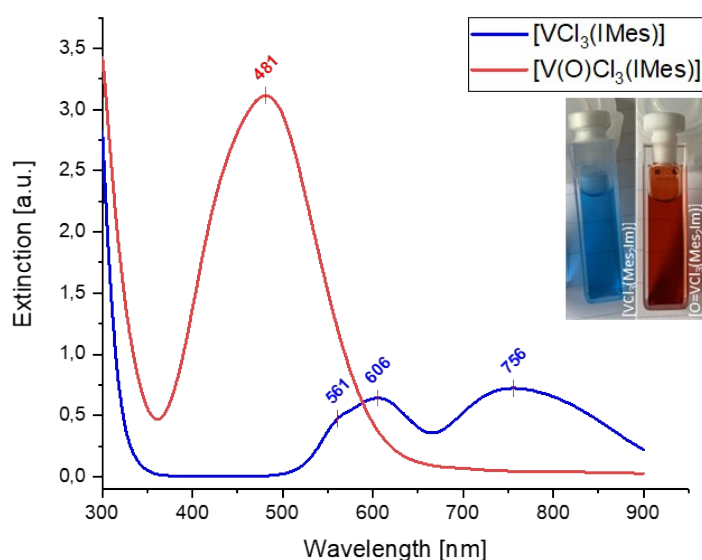

**Figure S44:** UV-VIS Spectra of  $[\text{VCl}_3(\text{IMes})]$  **2** (blue) and its oxidized form  $[\text{V}(\text{O})\text{Cl}_3(\text{IMes})]$  (red) in toluene at room temperature. Molar-extinction-coefficients of **2**:  $\epsilon_{561} = 234 \text{ L}\cdot\text{mol}^{-1}\text{cm}^{-1}$ ,  $\epsilon_{606} = 317 \text{ L}\cdot\text{mol}^{-1}\text{cm}^{-1}$ ,  $\epsilon_{756} = 357 \text{ L}\cdot\text{mol}^{-1}\text{cm}^{-1}$ . Molar-extinction-coefficients of oxidized form:  $\epsilon_{481} = 1540 \text{ L}\cdot\text{mol}^{-1}\text{cm}^{-1}$  (CT-transition).

### UV-VIS Spectra of $[\text{VCl}_3(\text{cAAC})_2]$ **7**

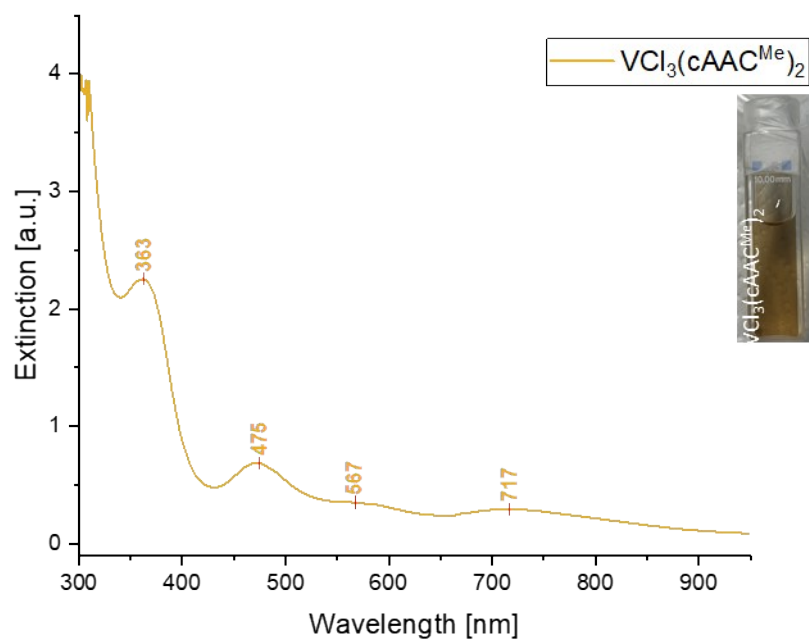

**Figure S45:** UV-VIS Spectra of  $[\text{VCl}_3(\text{cAAC})_2]$  **7** (orange) in toluene at room temperature. Molar-extinction-coefficients of **7** 363 ( $\epsilon = 939 \text{ Lmol}^{-1}\text{cm}^{-1}$ ), 475 ( $\epsilon = 287 \text{ Lmol}^{-1}\text{cm}^{-1}$ ), 567 ( $\epsilon = 145 \text{ Lmol}^{-1}\text{cm}^{-1}$ ), 717 ( $\epsilon = 123 \text{ Lmol}^{-1}\text{cm}^{-1}$ ).



#### 4) EPR Experimental Data

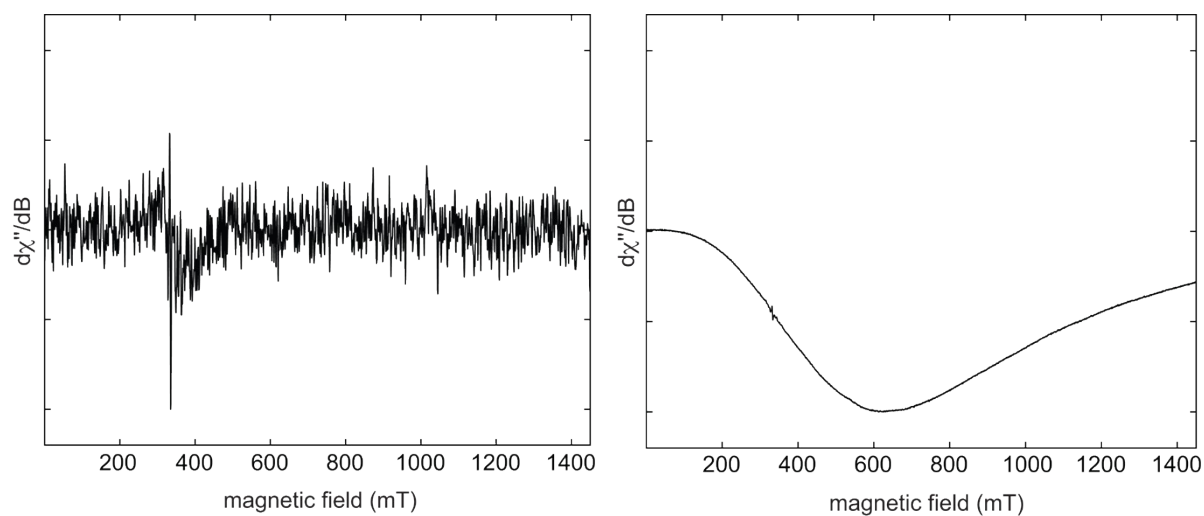

**Figure S46:** Experimental X-band CW EPR spectra of a powder sample of  $[\text{VCl}_3(\text{cAAC}^{\text{Me}})]$  **1** at room temperature (left) and 70 K (right).

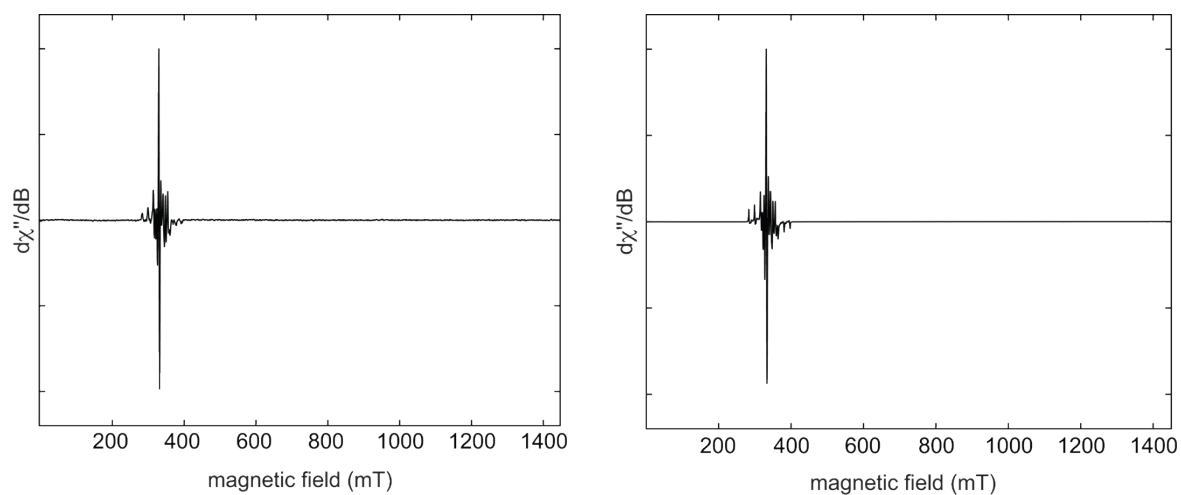

**Figure S47:** Experimental X-band CW EPR spectra of a microcrystalline sample of  $[\text{VCl}_3(\text{cAAC}^{\text{Me}})_2]$  **7** at room temperature (left) and 70 K (right). The detected resonances can be assigned to  $d^1$  impurities of the air-sensitive compound **7** (for more details see Figure S45 provided in the SI).

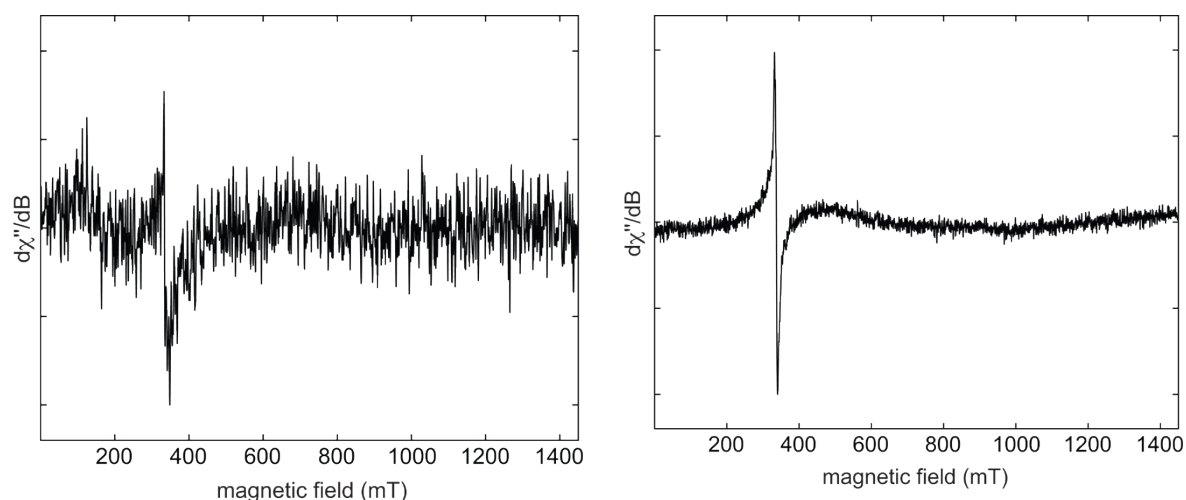

**Figure S48:** Experimental X-band CW EPR spectra of a microcrystalline sample of  $[\text{VCl}_3(\text{IMes})]$  **2** at room temperature (left) and 70 K (right).

In the absence of resolved features of zero-field splitting, the X-band CW EPR spectra of the vanadium complexes show only resonances for vanadium  $S = 1/2$  impurities at room temperature and 70 K (see Figure S46 in the SI). Only in the case of  $[\text{VCl}_3(\text{cAAC}^{\text{Me}})]$  (Figure S46), a broad baseline observed at 70 K might indicate the presence of electron-electron couplings expected for a  $S = 1$  spin state. As the zero field parameters in the solid state are not resolved by X-band EPR measurements, we also conducted EPR experiments of  $[\text{VCl}_3(\text{cAAC}^{\text{Me}})]$  (**1**),  $[\text{VCl}_3(\text{IMes})]$  (**2**),  $[\text{VCl}_3(\text{IDipp})]$  (**4**) and  $[\text{VCl}_3(\text{cAAC}^{\text{Me}})_2]$  (**7**) in solution. Again, only resonances associated with  $d^1$  impurities were detected (see Figure S49).

We also conducted a series of EPR experiments in toluene solutions of  $[\text{VCl}_3(\text{cAAC}^{\text{Me}})]$  (**1**),  $[\text{VCl}_3(\text{IMes})]$  (**2**),  $[\text{VCl}_3(\text{IPr})]$  (**4**) and  $[\text{VCl}_3(\text{cAAC}^{\text{Me}})_2]$  (**7**). The compounds were either crystallized from a saturated solution in toluene at  $-80^\circ\text{C}$  ( $[\text{VCl}_3(\text{cAAC}^{\text{Me}})]$  (**1**) and  $[\text{VCl}_3(\text{IPr})]$  (**4**)), sublimed ( $[\text{VCl}_3(\text{IMes})]$  (**2**)) or recrystallized from *n*-hexane ( $[\text{VCl}_3(\text{cAAC}^{\text{Me}})_2]$  (**7**)) prior to dissolution in dry toluene.

For  $[\text{VCl}_3(\text{IPr})]$  (**4**), only  $^{51}\text{V}$  hyperfine couplings ( $l = 7/2$ , 99.75% natural abundance) of a  $d^1$  impurity were resolved at 293 K and a typical octet-splitting pattern was detected, as depicted in Figure S145 (a). Similar EPR spectra were observed for comparable vanadium complexes.<sup>[1]</sup> Frozen solution EPR spectra, recorded at 70 K, revealed the corresponding anisotropic parameters for the  $d^1$  impurities in the mono NHC complex  $[\text{VCl}_3(\text{IMes})]$  (**2**), the mono- and bis  $\text{cAAC}^{\text{Me}}$  stabilized complexes  $[\text{VCl}_3(\text{cAAC}^{\text{Me}})]$  (**1**) and  $[\text{VCl}_3(\text{cAAC}^{\text{Me}})_2]$  (**7**) (see Figure S45). Apart from these resonances, no further signals could be observed in a full magnetic field sweep.

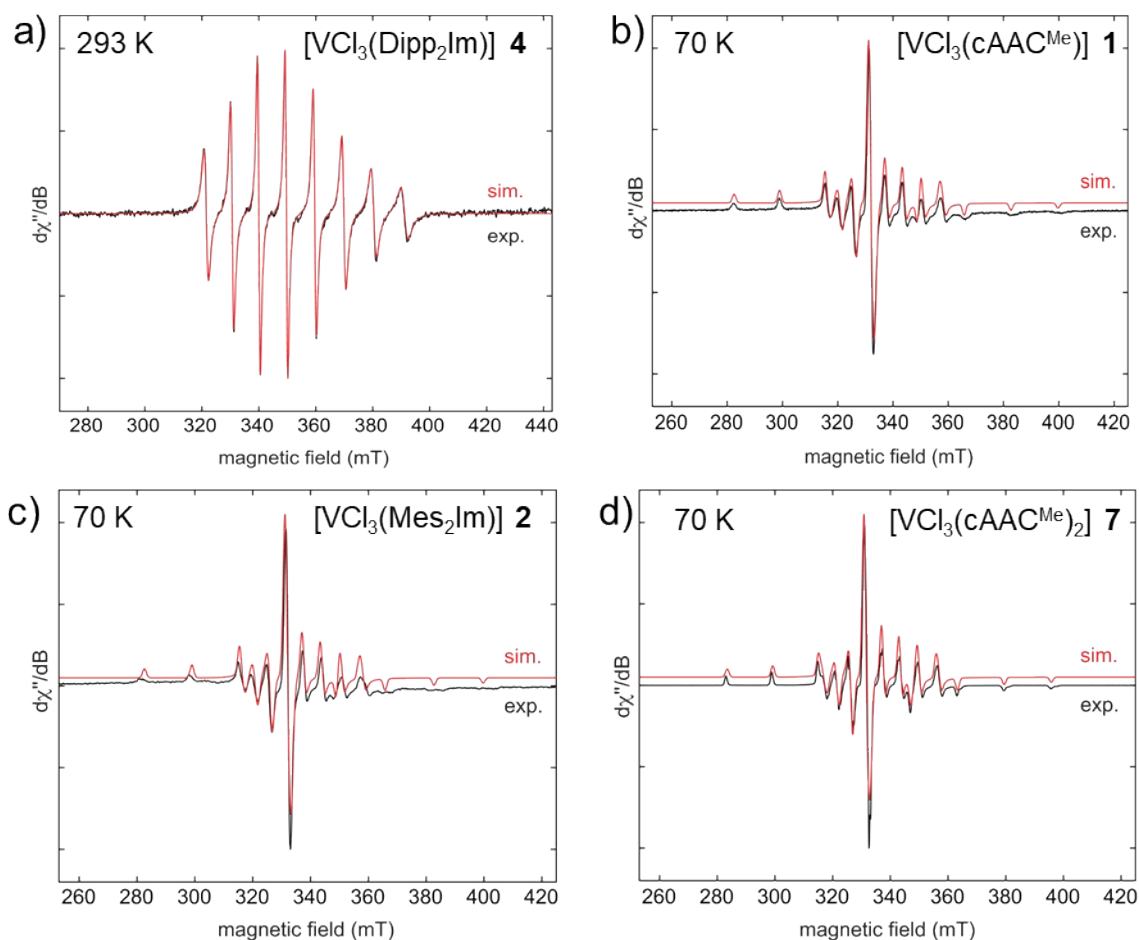

**Fig**

**ure S49:** (a) Experimental (black) and simulated (red) X-band CW-EPR spectrum of  $[\text{VCl}_3(\text{IDipp})]$  **4** (top left) dissolved in toluene at 293 K. The simulation leads to an orthorhombic  $g$  tensor ( $g_1 = 1.99$ ,  $g_2 = 1.96$ ,  $g_3 = 1.97$ ), vanadium hyperfine couplings of  $A(^{51}\text{V}) = 231$ , 255, and 343 MHz, and a rotational correlation time ( $\tau_r$ ) of 0.5 ns. (b) Experimental (black) and simulated (red) X-band CW-EPR spectrum of  $[\text{VCl}_3(\text{cAAC}^{\text{Me}})]$  **1** (top right) in frozen toluene at 70 K. The simulation leads to an axial  $g$  tensor ( $g_{\perp} = 1.983$ ,  $g_{\parallel} = 1.964$ ) and vanadium hyperfine couplings of  $A_{\perp}(^{51}\text{V}) = 161$  MHz and  $A_{\parallel}(^{51}\text{V}) = 460$  MHz. The full spectrum shows no additional features, meaning the baseline remains flat at 70 K. (c) Experimental (black) and simulated (red) X-band CW-EPR spectrum of  $[\text{VCl}_3(\text{IMes})]$  **2** (bottom left) in frozen toluene solution at 70 K. Simulation leads to an axial  $g$  tensor ( $g_{\perp} = 1.983$ ,  $g_{\parallel} = 1.964$ ) and vanadium hyperfine couplings of  $A_{\perp}(^{51}\text{V}) = 161$  MHz and  $A_{\parallel}(^{51}\text{V}) = 460$  MHz. The full spectrum shows no additional features, meaning the baseline remains flat at 70 K. (d) Experimental (black) and simulated (red) X-band CW-EPR spectrum of  $[\text{VCl}_3(\text{cAAC}^{\text{Me}})_2]$  **7** (bottom right) in frozen toluene at 70 K (black). Simulation (red) leads to an axial  $g$  tensor ( $g_{\perp} = 1.985$ ,  $g_{\parallel} = 1.973$ ) and vanadium hyperfine couplings of  $A_{\perp}(^{51}\text{V}) = 154$  MHz and  $A_{\parallel}(^{51}\text{V}) = 443$  MHz. The full spectrum shows no additional features, meaning the baseline remains flat at 70 K.

## 5) Computational details – optimized geometries

Calculations have been performed using the TURBOMOLE V7.2 program suite, a development of University of Karlsruhe and the Forschungszentrum Karlsruhe GmbH, 1989-2007, TURBOMOLE GmbH, since 2007; available from <http://www.turbomole.com>.<sup>[2]</sup> Geometry optimizations were performed using (RI-)DFT calculations<sup>[3]</sup> on a m4 grid employing the D3BJ<sup>[4]</sup> dispersion-corrected PBE0<sup>[5]</sup> functional and a def2-TZVP basis set for vanadium and for all other atoms the def2-SVP basis sets.<sup>[6]</sup> Vibrational frequencies were calculated at the same level with the AOFORCE<sup>[7]</sup> module and all structures represented true minima without imaginary frequencies.

### Cartesian coordinated of the complexes

#### ax,ax-[VCl<sub>3</sub>(lPr)<sub>2</sub>]

Energy = -3246.259574 h

|    |            |            |            |
|----|------------|------------|------------|
| V  | -0.4997386 | -0.3995759 | -0.0114592 |
| Cl | 1.7361376  | -0.3997538 | -0.5135899 |
| Cl | -1.7546157 | 1.4903443  | 0.1678698  |
| Cl | -1.7424058 | -2.2968182 | 0.1720594  |
| C  | -0.6107217 | -0.3978165 | -2.2567744 |
| N  | -0.6147102 | 0.6737150  | -3.0934349 |
| N  | -0.6197939 | -1.4657351 | -3.0978934 |
| C  | -0.6662318 | 0.2838344  | -4.4148397 |
| C  | -0.3943166 | 2.0711529  | -2.7115310 |
| C  | -0.6694542 | -1.0701062 | -4.4176705 |
| C  | -0.4064281 | -2.8657673 | -2.7216854 |
| H  | -0.6901533 | 0.9920452  | -5.2375128 |
| H  | -0.3136363 | 2.0604228  | -1.6202654 |
| C  | -1.5882502 | 2.9323943  | -3.0853313 |
| C  | 0.9252249  | 2.5682249  | -3.2840857 |
| H  | -0.6967054 | -1.7747761 | -5.2432706 |
| H  | -0.3228803 | -2.8593463 | -1.6306277 |
| C  | 0.9088060  | -3.3682748 | -3.2993687 |
| C  | -1.6061823 | -3.7188691 | -3.0954752 |
| H  | -1.4271113 | 3.9643919  | -2.7410215 |
| H  | -1.7494389 | 2.9631214  | -4.1750609 |
| H  | -2.4969810 | 2.5493133  | -2.6005540 |
| H  | 0.9093756  | 2.6206039  | -4.3843484 |
| H  | 1.1357451  | 3.5790956  | -2.9050951 |
| H  | 1.7475547  | 1.9062717  | -2.9759246 |
| H  | 1.1148731  | -4.3813581 | -2.9238685 |
| H  | 0.8898616  | -3.4173895 | -4.3997358 |
| H  | 1.7355919  | -2.7117436 | -2.9914955 |
| H  | -2.5114676 | -3.3327781 | -2.6066306 |
| H  | -1.7706997 | -3.7443494 | -4.1848501 |
| H  | -1.4498282 | -4.7530892 | -2.7556531 |
| C  | -0.3983892 | -0.3956557 | 2.2545872  |
| N  | -1.4962936 | -0.3989562 | 3.0612585  |
| N  | 0.6413786  | -0.3897209 | 3.1305702  |
| C  | -1.1459801 | -0.3953601 | 4.3921170  |
| C  | -2.9044177 | -0.4047998 | 2.6468492  |
| C  | 0.2074273  | -0.3894997 | 4.4381578  |
| C  | 2.0644993  | -0.3831538 | 2.7904272  |
| H  | -1.8786792 | -0.3972282 | 5.1932624  |
| H  | -2.8875692 | -0.4065721 | 1.5527795  |
| C  | -3.6003703 | 0.8643376  | 3.1124468  |
| C  | -3.5912307 | -1.6773161 | 3.1167268  |
| H  | 0.8867709  | -0.3852045 | 5.2850512  |
| H  | 2.0965557  | -0.3846285 | 1.6956412  |
| C  | 2.7418355  | -1.6499806 | 3.2892878  |
| C  | 2.7293054  | 0.8915559  | 3.2861086  |
| H  | -4.6284750 | 0.8856432  | 2.7224824  |
| H  | -3.6579641 | 0.9253025  | 4.2110694  |
| H  | -3.0716022 | 1.7488910  | 2.7316549  |
| H  | -3.6482606 | -1.7350356 | 4.2155480  |
| H  | -4.6192084 | -1.7072205 | 2.7269916  |

|   |            |            |           |
|---|------------|------------|-----------|
| H | -3.0562533 | -2.5593846 | 2.7388405 |
| H | 3.7842936  | -1.6763474 | 2.9398634 |
| H | 2.7556922  | -1.7099604 | 4.3895642 |
| H | 2.2288262  | -2.5415549 | 2.9001296 |
| H | 2.2073710  | 1.7771404  | 2.8951038 |
| H | 2.7428400  | 0.9542590  | 4.3862323 |
| H | 3.7713783  | 0.9274654  | 2.9363731 |

**ax,eq-[VCl<sub>3</sub>(I/Pr)<sub>2</sub>]**

Energy = -3246.262104 h

|    |            |            |            |
|----|------------|------------|------------|
| V  | -0.6724559 | -0.1317315 | 0.1539686  |
| Cl | -1.4802152 | -2.2705862 | -0.1687683 |
| Cl | -1.4809806 | 2.0094415  | -0.1525283 |
| Cl | -0.7946694 | -0.1369967 | 2.4439831  |
| C  | -0.6893671 | -0.1230724 | -2.0685946 |
| N  | 0.2685523  | -0.1207418 | -3.0286367 |
| N  | -1.8526857 | -0.1197497 | -2.7676355 |
| C  | -0.2822275 | -0.1167955 | -4.2955785 |
| C  | 1.7077446  | -0.1276820 | -2.7943840 |
| C  | -1.6264147 | -0.1159843 | -4.1256259 |
| C  | -3.2021065 | -0.1207388 | -2.1929885 |
| H  | 0.3164778  | -0.1147807 | -5.2014185 |
| H  | 1.8023086  | -0.1192891 | -1.7027806 |
| C  | 2.3525266  | 1.1333475  | -3.3481159 |
| C  | 2.3350769  | -1.4066182 | -3.3268144 |
| H  | -2.4292100 | -0.1128720 | -4.8567359 |
| H  | -3.0542537 | -0.1243608 | -1.1051688 |
| C  | -3.9429586 | -1.3912832 | -2.5771483 |
| C  | -3.9413657 | 1.1532349  | -2.5687137 |
| H  | 3.4158491  | 1.1676983  | -3.0685548 |
| H  | 2.2962203  | 1.1732850  | -4.4473531 |
| H  | 1.8564826  | 2.0291361  | -2.9474559 |
| H  | 2.2738547  | -1.4653341 | -4.4249654 |
| H  | 3.3987765  | -1.4500006 | -3.0498887 |
| H  | 1.8282231  | -2.2881659 | -2.9084952 |
| H  | -4.9181557 | -1.4187041 | -2.0699547 |
| H  | -4.1282103 | -1.4423706 | -3.6620919 |
| H  | -3.3670395 | -2.2738088 | -2.2669403 |
| H  | -3.3644604 | 2.0329150  | -2.2523294 |
| H  | -4.1262240 | 1.2118976  | -3.6533413 |
| H  | -4.9166713 | 1.1783623  | -2.0616129 |
| C  | 1.4657907  | -0.1346757 | 0.4212319  |
| N  | 2.2575632  | 0.9389859  | 0.6669870  |
| N  | 2.2558996  | -1.2087921 | 0.6702690  |
| C  | 3.5070903  | 0.5437888  | 1.0873966  |
| C  | 1.8253530  | 2.3406689  | 0.5916088  |
| C  | 3.5060132  | -0.8140562 | 1.0894730  |
| C  | 1.8223068  | -2.6104121 | 0.5998302  |
| H  | 4.2918368  | 1.2483780  | 1.3433491  |
| H  | 0.9332134  | 2.3280129  | -0.0505404 |
| C  | 2.8899440  | 3.2078034  | -0.0597107 |
| C  | 1.4087019  | 2.8390269  | 1.9661244  |
| H  | 4.2896851  | -1.5190379 | 1.3476192  |
| H  | 0.9300068  | -2.5990139 | -0.0420746 |
| C  | 1.4060099  | -3.1042087 | 1.9761036  |
| C  | 2.8859555  | -3.4808023 | -0.0487707 |
| H  | 2.4749775  | 4.2091816  | -0.2423897 |
| H  | 3.7750538  | 3.3367002  | 0.5831645  |
| H  | 3.2167816  | 2.7931167  | -1.0242007 |
| H  | 2.2681167  | 2.8658785  | 2.6555028  |
| H  | 0.9985221  | 3.8556581  | 1.8827640  |
| H  | 0.6314259  | 2.1864980  | 2.3889770  |
| H  | 0.9956781  | -4.1210578 | 1.8960112  |
| H  | 2.2656728  | -3.1292589 | 2.6652473  |
| H  | 0.6291605  | -2.4500955 | 2.3972494  |
| H  | 3.2134899  | -3.0695749 | -1.0144656 |
| H  | 3.7707524  | -3.6088352 | 0.5947161  |
| H  | 2.4697772  | -4.4822282 | -0.2284048 |

## 6) References

- [1] a) F. Basuli, U. J. Kilgore, X. Hu, K. Meyer, M. Pink, J. C. Huffman, D. J. Mindiola, *Angew. Chem. Int. Ed.* 2004, **43**, 3156-3159; (*Angew. Chem.* 2004, **116**, 3218–3221.); b) F. R. Neururer, S. Liu, D. Leitner, M. Baltrun, K. R. Fisher, H. Kopacka, K. Wurst, L. J. Daumann, D. Munz, S. Hohloch, *Inorg. Chem.* 2021, **60**, 15421-15434; c) C. Lorber, L. Vendier, *Dalton Trans.* 2009, **35**, 6972-6984; d) J. Telsler, C. C. Wu, K. Y. Chen, H. F. Hsu, D. Smirnov, A. Ozarowski, J. Krzystek, *J. Inorg. Biochem.* 2009, **103**, 487-495; e) T. A. Bazhenova, L. V. Zorina, S. V. Simonov, V. S. Mironov, O. V. Maximova, L. Spillecke, C. Koo, R. Klingeler, Y. V. Manakin, A. N. Vasiliev, E. B. Yagubskii, *Dalton Trans.* 2020, **49**, 15287-15298.
- [2] a) F. Furche, R. Ahlrichs, C. Hättig, W. Klopper, M. Sierka, F. T. Weigend, *Mol. Sci.* 2014, **4**, 91-100; b) R. Ahlrichs, M. Bär, M. Häser, H. Horn, C. Kölmel, *Chem. Phys. Lett.* 1989, **162**, 165-169.
- [3] a) O. Treutler, R. Ahlrichs, *J. Chem. Phys.* 1995, **102**, 346-354; b) M. Häser, R. Ahlrichs, *J. Comp. Chem.* 1989, **10**, 104-111.
- [4] a) S. Grimme, J. Antony, S. Ehrlich, H. Krieg, *J. Chem. Phys.* 2010, **132**, 154104; b) A. D. Becke, E. R. Johnson, *J. Chem. Phys.* 2005, **123**, 154101; c) E. R. Johnson, A. D. Becke, *J. Chem. Phys.* 2006, **124**, 174104; d) S. Grimme, S. Ehrlich, L. Goerigk, *J. Comp. Chem.* 2011, **32**, 1456-1465; e) E. R. Johnson, A. D. Becke, *J. Chem. Phys.* 2005, **123**, 024101.
- [5] a) J. P. Perdew, K. Burke, M. Ernzerhof, *Phys. Rev. Lett.* 1996, **77**, 3865; b) J. P. Perdew, M. Ernzerhof, K. Burke, *J. Chem. Phys.* 1996, **105**, 9982-9985; c) C. Adamo, V. Barone, *J. Chem. Phys.* 1999, **110**, 6158-6170; d) M. Ernzerhof, G. E. Scuseria, *J. Chem. Phys.* 1999, **110**, 5029-5036; e) J. Tao, J. P. Perdew, V. N. Staroverov, G. E. Scuseria, *Phys. Rev. Lett.* 2003, **91**, 146401; f) J. P. Perdew, J. Tao, V. N. Staroverov, G. E. Scuseria, *J. Chem. Phys.* 2004, **120**, 6898-6911.
- [6] a) A. Schäfer, H. Horn, R. Ahlrichs, *J. Chem. Phys.* 1992, **97**, 2571-2577; b) A. Schäfer, C. Huber, R. Ahlrichs, *J. Chem. Phys.* 1994, **100**, 5829-5835; c) K. Eichkorn, O. Treutler, H. Oehm, M. Häser, R. Ahlrichs, *Chem. Phys. Lett.* 1995, **242**, 652-660; d) F. Weigend, R. Ahlrichs, *Phys. Chem. Chem. Phys.* 2005, **7**, 3297-3305; e) F. Weigend, *Phys. Chem. Chem. Phys.* 2006, **8**, 1057-1065.
- [7] P. Deglmann, *Chem. Phys. Lett* 2004, **384**, 103-107.
